# Supplementary material for: The Potential Population-Level Impact of Different Gonorrhea Screening Strategies in Baltimore and San Francisco: An Exploratory Mathematical Modeling Analysis
Source: PubMed Central journal article supplement — Sex Transm Dis. 2019 Dec 12;47(3):143–50. doi: 10.1097/OLQ.0000000000001108 (PMC7012354; doi:10.1097/olq.0000000000001108), 2019-12-12
Supplement: olq-47-143-s002.pdf [file olq-47-143-s002.pdf]

# Supplementary material 1

|                                                                                                                                                                                                                                                                                                                                                                                                                                                                                                                                                                      |           |
|----------------------------------------------------------------------------------------------------------------------------------------------------------------------------------------------------------------------------------------------------------------------------------------------------------------------------------------------------------------------------------------------------------------------------------------------------------------------------------------------------------------------------------------------------------------------|-----------|
| <b>MODEL PARAMETERS</b>                                                                                                                                                                                                                                                                                                                                                                                                                                                                                                                                              | <b>2</b>  |
| <b>TABLE S1. PARAMETER DISTRIBUTIONS USED IN THE MODEL</b>                                                                                                                                                                                                                                                                                                                                                                                                                                                                                                           | <b>2</b>  |
| <b>ADDITIONAL MODEL DETAIL</b>                                                                                                                                                                                                                                                                                                                                                                                                                                                                                                                                       | <b>9</b>  |
| USE OF NSFG DATA TO REPRODUCE SEXUAL MIXING BY AGE AND RACE/ETHNICITY                                                                                                                                                                                                                                                                                                                                                                                                                                                                                                | 9         |
| USE OF NHANES DATA TO CALIBRATE TO GONORRHEA PREVALENCE                                                                                                                                                                                                                                                                                                                                                                                                                                                                                                              | 9         |
| CALIBRATION OF THE MODEL                                                                                                                                                                                                                                                                                                                                                                                                                                                                                                                                             | 9         |
| ASSUMING POSTERIOR VALUES FROM THE NATIONAL-LEVEL MODEL AS PRIORS                                                                                                                                                                                                                                                                                                                                                                                                                                                                                                    | 10        |
| INCREASING TRANSMISSION PROBABILITY                                                                                                                                                                                                                                                                                                                                                                                                                                                                                                                                  | 10        |
| INCIDENCE ESTIMATE FOR MSM                                                                                                                                                                                                                                                                                                                                                                                                                                                                                                                                           | 10        |
| REMOVING LOSS TO FOLLOW-UP                                                                                                                                                                                                                                                                                                                                                                                                                                                                                                                                           | 10        |
| IMPLEMENTING MOBILE OUTREACH TESTING SCENARIOS                                                                                                                                                                                                                                                                                                                                                                                                                                                                                                                       | 11        |
| <b>SUPPLEMENTARY RESULTS</b>                                                                                                                                                                                                                                                                                                                                                                                                                                                                                                                                         | <b>12</b> |
| <b>FIGURE S1. PERCENTAGE BREAKDOWN OF NEW INFECTIONS ESTIMATED TO OCCUR ON THE LAST CALIBRATION YEAR (2017 AND 2016 FOR BALTIMORE CITY AND SAN FRANCISCO, RESPECTIVELY).</b>                                                                                                                                                                                                                                                                                                                                                                                         | <b>12</b> |
| <b>TABLE S2. MODEL-ESTIMATED PREVALENCE, CUMULATIVE INFECTIONS AVERTED AND ADDITIONAL TESTS AFTER 5 YEARS IN BALTIMORE.</b>                                                                                                                                                                                                                                                                                                                                                                                                                                          | <b>13</b> |
| <b>TABLE S3. MODEL-ESTIMATED PREVALENCE, CUMULATIVE INFECTIONS AVERTED AND ADDITIONAL TESTS AFTER 5 YEARS IN SAN FRANCISCO.</b>                                                                                                                                                                                                                                                                                                                                                                                                                                      | <b>14</b> |
| <b>SENSITIVITY ANALYSIS ON THE POPULATION-LEVEL IMPACT OF INCREASING SCREENING FOR MSM</b>                                                                                                                                                                                                                                                                                                                                                                                                                                                                           | <b>15</b> |
| <b>FIGURE S2. SENSITIVITY ANALYSIS OF THE IMPACT OF SCREENING MSM. INTERVENTIONS VARY SCREENING FROM ONCE-A-YEAR (1x) TO 5-TIMES-A-YEAR (5x). OUTPUTS EXAMINED ARE CUMULATIVE INFECTIONS AVERTED (Y-AXIS) AND CUMULATIVE NUMBER OF ADDITIONAL TESTS NEEDED COMPARED TO BASE CASE (CALIBRATED MODEL) OVER THE FIVE-YEAR INTERVENTION PERIOD. EACH SIMULATION IS PRESENTED AS A POINT ON THE SCATTER PLOT WITH MEAN OF THE SCENARIOS PRESENTED AS BLACK CIRCLES.</b>                                                                                                   | <b>16</b> |
| <b>FIGURE S3. SENSITIVITY ANALYSIS OF THE IMPACT OF SCREENING MSM AMONG THE TOTAL POPULATION. INTERVENTIONS VARY SCREENING FROM ONCE-A-YEAR (1x) TO 5-TIMES-A-YEAR (5x). OUTPUTS EXAMINED ARE MODEL-ESTIMATED MEAN OF DIAGNOSED INFECTIONS, CUMULATIVE INFECTIONS, NUMBER OF SCREENING TESTS DONE, PREVALENCE, INFECTIONS AVERTED AND NUMBER OF ADDITIONAL TESTS NEEDED COMPARED TO BASE CASE. THE NUMBERS PRESENTED AS ABSOLUTE, OR ABSOLUTE DIFFERENCE (WHERE COMPARISON TO BASE CASE IS MADE). NOTE THAT THE Y-AXIS DOES NOT START AT ZERO IN ALL THE PANELS.</b> | <b>17</b> |
| <b>SENSITIVITY ANALYSIS FOR THE MOBILE OUTREACH TESTING</b>                                                                                                                                                                                                                                                                                                                                                                                                                                                                                                          | <b>18</b> |
| <b>FIGURE S4. POPULATION PREVALENCE ESTIMATES PER 100 PERSONS DURING THE INTERVENTION PERIOD, PRESENTED AS THE MEAN OF THE CALIBRATED MODEL (BASE CASE) AND FOR THE COUNTERFACTUAL MOBILE OUTREACH INTERVENTIONS.</b>                                                                                                                                                                                                                                                                                                                                                | <b>18</b> |
| <b>FIGURE S5. CUMULATIVE INFECTIONS AVERTED AND ADDITIONAL TESTS RELATIVE TO THE CALIBRATED MODEL (%) FOR THE POPULATION IN A) BALTIMORE CITY AND B) SAN FRANCISCO FOR THE 5-YEAR TIME PERIOD.</b>                                                                                                                                                                                                                                                                                                                                                                   | <b>19</b> |
| <b>REFERENCES</b>                                                                                                                                                                                                                                                                                                                                                                                                                                                                                                                                                    | <b>20</b> |

## Model parameters

**Table S1.** Parameter distributions used in the model

| Parameter                                      | Description                                       | Parameter in the Model* | Prior Distribution <sup>†</sup> | Median  | Mode | 95% range | References / Changes from national model |                   |
|------------------------------------------------|---------------------------------------------------|-------------------------|---------------------------------|---------|------|-----------|------------------------------------------|-------------------|
| <b>Population Structure</b>                    |                                                   |                         |                                 |         |      |           |                                          |                   |
| Total population size                          | Baltimore                                         | N                       | Fixed                           | 242,185 | NA   | NA        |                                          |                   |
|                                                | San Francisco                                     |                         | Fixed                           | 359,020 | NA   | NA        |                                          |                   |
| Average time in model (y)                      |                                                   | $1/\mu$                 | Fixed                           | 25      | NA   | NA        |                                          |                   |
| Proportion of population in each subpopulation | Baltimore, Black                                  | $pop_i$                 | Fixed                           | 0.57    | NA   | NA        |                                          |                   |
|                                                | Baltimore, Other                                  |                         | Fixed                           | 0.37    | NA   | NA        |                                          |                   |
|                                                | Baltimore, Hispanic                               |                         | Fixed                           | 0.06    | NA   | NA        |                                          |                   |
|                                                | Baltimore, MSM                                    |                         |                                 | 0.04    | NA   | NA        | <sup>1</sup>                             |                   |
|                                                | San Francisco, Black                              |                         | Fixed                           | 0.045   | NA   | NA        |                                          |                   |
|                                                | San Francisco, Other                              |                         | Fixed                           | 0.793   | NA   | NA        |                                          |                   |
|                                                | San Francisco, Hispanic                           |                         | Fixed                           | 0.162   | NA   | NA        |                                          |                   |
|                                                | San Francisco, MSM                                |                         |                                 | 0.185   | NA   | NA        | <sup>1</sup>                             |                   |
|                                                | Proportion who are Sexually Active, 15-24 y males | Black                   | $P_{S,ijkl}$                    | Fixed   | 0.78 | NA        | NA                                       | NSFG <sup>2</sup> |
|                                                |                                                   | Other                   |                                 | Fixed   | 0.64 | NA        | NA                                       | "                 |
| Hispanic                                       |                                                   |                         | Fixed                           | 0.68    | NA   | NA        | "                                        |                   |
| MSM                                            |                                                   |                         | Fixed                           | 0.67    | NA   | NA        | (mean value assumed)                     |                   |
| Proportion who are Sexually                    |                                                   |                         | Fixed                           | 0.96    | NA   | NA        | NSFG – no significant                    |                   |

| Parameter                                                  | Description                                | Parameter in the Model* | Prior Distribution † | Median | Mode | 95% range    | References / Changes from national model       |
|------------------------------------------------------------|--------------------------------------------|-------------------------|----------------------|--------|------|--------------|------------------------------------------------|
| Active, 25-39 y males                                      |                                            |                         |                      |        |      |              | difference between subpopulations <sup>2</sup> |
| Proportion who are Sexually Active, 15-24 y females        |                                            |                         | Fixed                | 0.66   | NA   | NA           | "                                              |
| Proportion of 25-39 y females                              |                                            |                         | Fixed                | 0.98   | NA   | NA           | "                                              |
| Proportion of the Population in Each Sexual Activity Group | LowActivity (lower partner change rate)    |                         | Fixed                | 0.90   | NA   | NA           | Assumption                                     |
|                                                            | High Activity (higher partner change rate) |                         | Fixed                | 0.10   | NA   | NA           | "                                              |
| <b>Behavior</b>                                            |                                            |                         |                      |        |      |              |                                                |
| Mixing with same sexual activity group                     | Stratified by race/ethnicity               | $\varepsilon_{1,j}$     | Beta (1.5, 1.5)      | 0.50   | 0.50 | (0.06, 0.94) | Uninformative prior                            |
| Mixing with same age                                       | Male 15-24 y and Female 25-39 y            | $\varepsilon_{2,ijt}$   | Beta (9,2.7)         | 0.78   | 0.82 | (0.5, 0.95)  | NSFG <sup>2</sup>                              |
|                                                            | Male 25-39 y and Female 15-24 y            |                         | Beta (6.1,2.3)       | 0.74   | 0.80 | (0.4, 0.95)  | "                                              |
|                                                            | MSM                                        |                         | Beta (8,3.8)         | 0.69   | 0.71 | (0.4, 0.9)   | "                                              |
| Mixing with same subpopulation                             | Black male                                 | $\varepsilon_{3,ij}$    | Beta (172.7,52.4)    | 0.77   | 0.77 | (0.71, 0.82) | "                                              |
|                                                            | Hispanic male                              |                         | Beta (547.2,70.3)    | 0.89   | 0.89 | (0.86, 0.91) | "                                              |
|                                                            | Other male                                 |                         | Beta (183.7,72.6)    | 0.72   | 0.72 | (0.66, 0.77) | "                                              |
|                                                            | MSM                                        |                         | Beta (47.5,2.5)      | 0.96   | 0.97 | (0.88, 0.99) | "                                              |
|                                                            | Black female                               |                         | Beta (217,28.8)      | 0.88   | 0.89 | (0.84, 0.92) | "                                              |
|                                                            | Hispanic Female                            |                         | Beta (437.1,70.4)    | 0.86   | 0.86 | (0.83, 0.89) | "                                              |
|                                                            | Other female                               |                         | Beta(99.1,59.1)      | 0.55   | 0.63 | (0.70, 0.65) | "                                              |

| Parameter                                           | Description                          | Parameter in the Model* | Prior Distribution <sup>†</sup> | Median           | Mode  | 95% range      | References / Changes from national model |
|-----------------------------------------------------|--------------------------------------|-------------------------|---------------------------------|------------------|-------|----------------|------------------------------------------|
| Minimum rate of partner acquisition                 | Stratified by race/ethnicity and age | $c_{min,jl}$            | Gamma (5,5)                     | 0.93             | 0.80  | (0.32, 2.05)   | NSFG <sup>2</sup>                        |
| Relative rate of partner acquisition, males 15-24 y |                                      | $r_{pijkl}$             |                                 |                  |       |                | NSFG <sup>2</sup>                        |
|                                                     | Black, low activity                  |                         | Gamma(2.2, 0.6)                 | 3.13             | 2.00  | (0.51, 9.86)   | "                                        |
|                                                     | Black, high activity                 |                         | Normal(32.5, 8.9)               | 32.50            | 32.50 | (15.06, 49.94) | "                                        |
|                                                     | Hispanic, low activity               |                         | Fixed                           | 1.0              |       |                | "                                        |
|                                                     | Hispanic, high activity              |                         | Gamma(4.3, 0.6)                 | 6.62             | 5.50  | (2.07, 15.36)  | "                                        |
|                                                     | Other, low activity                  |                         | Gamma(2.2, 0.6)                 | 3.13             | 2.00  | (0.51, 9.86)   | "                                        |
|                                                     | Other, high activity                 |                         | Normal(27.5, 11.5)              | 27.50            | 27.50 | (4.96, 50.04)  | "                                        |
|                                                     | MSM, low activity                    |                         | Fixed                           | 1                |       |                | "                                        |
|                                                     | MSM, high activity                   |                         | Normal(45, 15.3)                | 45.00            | 45.00 | (15.01, 74.99) | "                                        |
| Relative rate of partner acquisition, males 25-39 y |                                      | $r_{pijkl}$             |                                 |                  |       |                |                                          |
|                                                     | Black, low activity                  |                         | Gamma(3.4, 1.6)                 | 1.92             | 1.50  | (0.5, 4.91)    | "                                        |
|                                                     | Black, high activity                 |                         | Normal(45, 15.3)                | 45.00            | 45.00 | (15.01, 74.99) | "                                        |
|                                                     | Hispanic, low activity               |                         | Fixed                           | 1                |       |                | "                                        |
|                                                     | Hispanic, high activity              |                         | Gamma(5.3,0.4)                  | 12.43            | 10.75 | (4.48, 26.68)  | "                                        |
|                                                     | Other, low activity                  |                         | Gamma(3.4, 1.6)                 | 1.92             | 1.50  | (0.5, 4.91)    | "                                        |
|                                                     | Other, high activity                 |                         | Normal(45, 15.3)                | 45.00            | 45.00 | (15.01, 74.99) | "                                        |
|                                                     | MSM, low activity                    |                         | Fixed                           | 1                |       |                | "                                        |
|                                                     | MSM, high activity                   |                         | Normal(45.0, 15.3)              | 45.0 (15.0-75.0) |       |                | "                                        |

| Parameter                                             | Description             | Parameter in the Model* | Prior Distribution †  | Median           | Mode  | 95% range     | References / Changes from national model            |
|-------------------------------------------------------|-------------------------|-------------------------|-----------------------|------------------|-------|---------------|-----------------------------------------------------|
| Relative rate of partner acquisition, females 15-24 y |                         | $\rho_{ijkl}$           |                       |                  |       |               |                                                     |
|                                                       | Black, low activity     |                         | Gamma(2.2, 0.6)       | 3.7 (0.5-10.0)   |       |               | „                                                   |
|                                                       | Black, high activity    |                         | Gamma(1.9, 0.1)       | 17.7 (2.0-50.0)  |       |               | „                                                   |
|                                                       | Hispanic, low activity  |                         | Fixed                 | 1                |       |               | „                                                   |
|                                                       | Hispanic, high activity |                         | Gamma(4.3, 0.6)       | 7.0 (2.0, 15.0)  |       |               | „                                                   |
|                                                       | Other, low activity     |                         | Gamma(2.2, 0.6)       | 3.7 (0.5-10.0)   |       |               | „                                                   |
|                                                       | Other, high activity    |                         | Gamma(5.3, 0.4)       | 14.9 (5.0-30.0)  |       |               | „                                                   |
| Relative rate of partner acquisition, females 25-39 y |                         | $\rho_{ijkl}$           |                       |                  |       |               | „                                                   |
|                                                       | Black, low activity     |                         | Gamma(3.4, 1.6)       | 2.2 (0.5-5.0)    |       |               | „                                                   |
|                                                       | Black, high activity    |                         | Gamma(8.5, 0.8)       | 11.3 (5.0-20.0)  |       |               | „                                                   |
|                                                       | Hispanic, low activity  |                         | Fixed                 | 1                |       |               | „                                                   |
|                                                       | Hispanic, high activity |                         | Gamma(5.3,0.4)        | 14.9 (5.0, 30.0) |       |               | „                                                   |
|                                                       | Other, low activity     |                         | Gamma(3.4,1.6)        | 2.2 (0.5-5.0)    |       |               | „                                                   |
|                                                       | Other, high activity    |                         | Gamma(5.3,0.4)        | 14.9 (5.0-30.0)  |       |               | „                                                   |
| <b>Natural history</b>                                |                         |                         |                       |                  |       |               |                                                     |
| Probability of Transmission                           | Male to Female          | $\beta_{ji}$            | Beta (10.8,21.4)      | 0.33             | 0.32  | (0.19, 0.5)   | Fit to national posterior distribution <sup>3</sup> |
|                                                       | Female to Male          |                         | Beta (41,13.8)        | 0.75             | 0.76  | (0.63, 0.85)  | „                                                   |
|                                                       | Male to Male            |                         | Beta (18.7,21.4)      | 0.47             | 0.46  | (0.32, 0.62)  | „                                                   |
| Average duration of symptomatic infection, d          | Male                    | $1/\gamma_{ij}$         | Gamma (5.48,0.416)    | 12.38            | 10.77 | (4.56, 26.28) | Fit to national posterior distribution <sup>3</sup> |
|                                                       | MSM                     |                         | Gamma (3.5276,0.2932) | 10.92            | 8.62  | (2.93, 27.45) | „                                                   |
|                                                       | Female                  |                         | Gamma (3.026,0.3568)  | 7.57             | 5.68  | (1.77, 20.36) | „                                                   |

| Parameter                                            | Description                                                                                                                                                                   | Parameter in the Model* | Prior Distribution † | Median    | Mode   | 95% range        | References / Changes from national model                                                                 |
|------------------------------------------------------|-------------------------------------------------------------------------------------------------------------------------------------------------------------------------------|-------------------------|----------------------|-----------|--------|------------------|----------------------------------------------------------------------------------------------------------|
| Average duration of asymptomatic infection, d        | Male                                                                                                                                                                          | $1/\delta_{ij}$         | Normal (244.5,54.6)  | 244.50    | 244.50 | (137.49, 351.51) | "                                                                                                        |
|                                                      | MSM                                                                                                                                                                           |                         | Normal (242.2,48.5)  | 242.20    | 242.20 | (147.14, 337.26) | "                                                                                                        |
|                                                      | Female                                                                                                                                                                        |                         | Normal (261.4,46.3)  | 261.40    | 261.40 | (170.65, 352.15) | "                                                                                                        |
| Probability of symptomatic infection                 | Male                                                                                                                                                                          | $\sigma_{ij}$           | Beta (74.2,26.6)     | 0.74      | 0.74   | (0.65, 0.82)     | Fit to national posterior distribution <sup>3</sup>                                                      |
|                                                      | Female                                                                                                                                                                        |                         | Beta (32.8,58.6)     | 0.36      | 0.36   | (0.26, 0.46)     | "                                                                                                        |
|                                                      | MSM                                                                                                                                                                           |                         | Beta (17.9,10.9)     | 0.62      | 0.63   | (0.44, 0.79)     | "                                                                                                        |
| Annual increase in transmission                      | MSM                                                                                                                                                                           | $C_{1,rr}$              | Beta (1,15)          | 0.0451584 | 0      | (0, 0.22)        | Assumption                                                                                               |
| Annual increase in transmission                      | MSW, F                                                                                                                                                                        | $C_{2,rr}$              | Beta (1,15)          | 0.0451584 | 0      | (0, 0.22)        | Addition to the model to allow for potential increases in heterosexual acquisition risk at urban centers |
|                                                      |                                                                                                                                                                               |                         |                      |           |        |                  |                                                                                                          |
| <b>Screening and Reporting</b>                       |                                                                                                                                                                               |                         |                      |           |        |                  |                                                                                                          |
| Probability asymptomatic case is reported if treated | Implemented as a Bezier curve with four control points (a-d) for the years from 2002 to end of calibration data. Here showing the start and end. Mid-points are Beta(1.1,1.1) | $\Pi_a$                 | Beta (90.1,25.5)     | 0.78      | 0.78   | (0.7, 0.85)      | <sup>3</sup>                                                                                             |
|                                                      |                                                                                                                                                                               | $\Pi_d$                 | Beta (116.1,12.1)    | 0.91      | 0.91   | (0.85, 0.95)     | "                                                                                                        |
| Relative risk case is reported if symptomatic        | Nonblack male                                                                                                                                                                 | $rr_{symp,ij}$          | Beta (12,3)          | 0.81      | 0.85   | (0.57, 0.95)     | More constrained prior than in the national model <sup>3</sup>                                           |

| Parameter                                                            | Description                                                                                                                                                                    | Parameter in the Model* | Prior Distribution †    | Median | Mode | 95% range    | References / Changes from national model           |
|----------------------------------------------------------------------|--------------------------------------------------------------------------------------------------------------------------------------------------------------------------------|-------------------------|-------------------------|--------|------|--------------|----------------------------------------------------|
|                                                                      |                                                                                                                                                                                |                         |                         |        |      |              | assuming reporting should be better at local level |
|                                                                      | Black male                                                                                                                                                                     |                         | Beta (12,3)             | 0.81   | 0.85 | (0.57, 0.95) | "                                                  |
|                                                                      | Nonblack female                                                                                                                                                                |                         | Beta (12,3)             | 0.81   | 0.85 | (0.57, 0.95) | "                                                  |
|                                                                      | Black female                                                                                                                                                                   |                         | Beta (12,3)             | 0.81   | 0.85 | (0.57, 0.95) | "                                                  |
| Annual asymptomatic screen and treat rate, low sexual activity group | Implemented as a Bezier curve with four control points (a-d) for the years from 2002 to end of calibration data. Here showing the start and end. Mid-points are Beta(1.1,1.1). | $\psi_{ijl}$            |                         |        |      |              | 3                                                  |
|                                                                      | Other and Hispanic F 15-24                                                                                                                                                     |                         | Start: Beta (12.6,24.3) | 0.34   | 0.33 | (0.2, 0.5)   | "                                                  |
|                                                                      |                                                                                                                                                                                |                         | End: Beta (24.7,33.8)   | 0.42   | 0.42 | (0.3, 0.55)  | "                                                  |
|                                                                      | Other and Hispanic F 25-39                                                                                                                                                     |                         | Start: Beta (6.7,22)    | 0.23   | 0.21 | (0.1, 0.4)   | "                                                  |
|                                                                      |                                                                                                                                                                                |                         | End: Beta (7.9,17.4)    | 0.31   | 0.30 | (0.15, 0.5)  | "                                                  |
|                                                                      | Other and Hispanic M 15-24                                                                                                                                                     |                         | Start: Beta (2.6,22.3)  | 0.09   | 0.07 | (0.02, 0.25) | "                                                  |
|                                                                      |                                                                                                                                                                                |                         | End: Beta (2.6,22.3)    | 0.09   | 0.07 | (0.02, 0.25) | "                                                  |
|                                                                      | Other and Hispanic M 24-39                                                                                                                                                     |                         | Start: Beta (2.6,22.3)  | 0.09   | 0.07 | (0.02, 0.25) | "                                                  |
|                                                                      |                                                                                                                                                                                |                         | End: Beta (2.6,22.3)    | 0.09   | 0.07 | (0.02, 0.25) | "                                                  |
|                                                                      | MSM 15-24                                                                                                                                                                      |                         | Start: Beta (5.7,10.2)  | 0.35   | 0.34 | (0.15, 0.6)  | "                                                  |
|                                                                      |                                                                                                                                                                                |                         | End: Beta (7,9.9)       | 0.41   | 0.40 | (0.2, 0.65)  | "                                                  |
|                                                                      | MSM 25-39                                                                                                                                                                      |                         | Start: Beta (5.7,10.2)  | 0.35   | 0.34 | (0.15, 0.6)  | "                                                  |
|                                                                      |                                                                                                                                                                                |                         | End: Beta (7,9.9)       | 0.41   | 0.40 | (0.2, 0.65)  | "                                                  |

| Parameter                  | Description            | Parameter in the Model* | Prior Distribution <sup>†</sup> | Median | Mode | 95% range    | References / Changes from national model |
|----------------------------|------------------------|-------------------------|---------------------------------|--------|------|--------------|------------------------------------------|
|                            | Black F 15-24          |                         | Start: Beta (12.6,24.3)         | 0.34   | 0.33 | (0.2, 0.5)   | "                                        |
|                            |                        |                         | End: Beta (24.7,33.8)           | 0.42   | 0.42 | (0.3, 0.55)  | "                                        |
|                            | Black F 25-39          |                         | Start: Beta (6.7,22)            | 0.23   | 0.21 | (0.1, 0.4)   | "                                        |
|                            |                        |                         | End: Beta (7.9,17.4)            | 0.31   | 0.30 | (0.15, 0.5)  | "                                        |
|                            | Black M 15-24          |                         | Start: Beta (2.6,22.3)          | 0.09   | 0.07 | (0.02, 0.25) | "                                        |
|                            |                        |                         | End: Beta (2.6,22.3)            | 0.09   | 0.07 | (0.02, 0.25) | "                                        |
|                            | Black M 24-39          |                         | Start: Beta (2.6,22.3)          | 0.09   | 0.07 | (0.02, 0.25) | "                                        |
|                            |                        |                         | End: Beta (2.6,22.3)            | 0.09   | 0.07 | (0.02, 0.25) | "                                        |
| Relative Rate of Screening | Hispanic M vs. Other M | rr_pop <sub>ij</sub>    | Gamma (8.5,7.5)                 | 1.09   | 1.00 | (0.5, 2.01)  | "                                        |
|                            | Hispanic F vs. Other F |                         | Gamma (8.5,7.5)                 | 1.09   | 1.00 | (0.5, 2.01)  | "                                        |
|                            | High Activity          |                         | Gamma (8.5,7.5)                 | 1.09   | 1.00 | (0.5, 2.01)  | "                                        |

\*Subscripts i, j, k, and l indicate subpopulation, sex, sexual activity group, and age group, respectively. Model parameters correspond to the parameters described in Tuite *et al.* (2018).<sup>3</sup>

<sup>†</sup>Gamma distributions are described by shape ( $\alpha$ ) and rate ( $\beta$ ) parameters; beta distributions are described by shape parameters ( $\alpha$  and  $\beta$ ).



## Additional model detail

### Use of NSFG data to reproduce sexual mixing by age and race/ethnicity

NSFG 2011-2013 data were used to characterize self-reported sexual mixing patterns by age and race/ethnicity by analyzing data from individuals who had reported ever having had sex and stratifying the results by respondents' race/ethnicity and the race/ethnicity of their most recent opposite-sex sex partner. Poster by Tuite *et al.* was presented at CDC STD 2016 conference (URL to poster: [https://cdn2.sph.harvard.edu/wp-content/uploads/sites/54/2016/07/Tuite\\_mixing\\_CDC\\_STD.pdf](https://cdn2.sph.harvard.edu/wp-content/uploads/sites/54/2016/07/Tuite_mixing_CDC_STD.pdf)), which describes the analysis and its results in more detail. Mixing was more assortative by race/ethnicity and age than we would expect if mixing was independent of race/ethnicity or age.

Sexual mixing in the model was defined by age and race/ethnicity using a mixing matrix where mixing by age and race/ethnicity was allowed to vary from fully assortative to proportionate. Given mixing by age did not differ by race/ethnicity in NSFG data, these two mixing patterns were modeled independently. Age mixing was accounted for in the model calibration stage (see calibration supplements, page 1, panel B), where distribution of partnerships in the model were calibrated to the respective data from NSFG. Use of NSFG assumes that national level patterns of sexual mixing among the heterosexual population are a good approximation of sexual mixing at local level. A further simplification we made was to calibrate to age-mixing only and not calibrate to race/ethnicity mixing. Instead, we compared the model outputs for race/ethnicity mixing to NSFG data. Further description of the modeling of sexual mixing can be found in the supplement of Tuite et al. 2018.<sup>3</sup>

### Use of NHANES data to calibrate to gonorrhea prevalence

We pooled NHANES gonorrhea prevalence for 1999-2008 by race/ethnicity (Non-Hispanic White and Other, Non-Hispanic Black, Hispanic) and age (15-24, 25-39) to reflect plausible prevalence among women. Given the data are older, and prevalence at national-level may not be a good proxy for city-level prevalence, we calibrated to the data allowing for a larger variance to ensure that the prevalence data did not restrict the calibration to local-level data. The modeled calibrated prevalence estimates for women were higher than NHANES prevalence estimates in Baltimore and similar to NHANES in San Francisco (see supplements 2 and 3, page 1). The dominance of city-level gonorrhea diagnosis rates in guiding the calibration are demonstrated in Figure S1 in supplement 1, where the model-predicted incidence closely matches the diagnoses in each city.

### Calibration of the model

We calibrated the model using a Bayesian framework. Calibrated parameter values were obtained using Markov chain Monte Carlo (MCMC) simulation, implemented with a Metropolis-Hastings algorithm.<sup>4</sup> Parameters governing the natural history of gonorrhea, sexual behaviors and treatment are varied in calibration. Because there are fewer data describing local-level gonorrhea epidemiology compared to the previous national-level analysis,<sup>3</sup> we made the following simplifications regarding model parameterization. i) Prior distributions for natural history parameters were defined based on posterior distributions estimated in the previous study, under the assumption that these parameters should be relatively invariant across locations. ii) For parameters determining reporting probabilities of symptomatic male infection, we defined informative prior distributions assuming better gonorrhea

diagnosis reporting in the cities compared to the level estimated nationally. iii) The national-level analysis allowed increasing risk behavior for MSM. We accommodated potential increases in risk behavior in different population groups by allowing increasing transmission independently for the MSM and heterosexual populations. Parameters used in the model are presented in Supplementary Material 1, Table S1, along with further information on the assumptions and differences compared to the published national-level analysis.

### **Assuming posterior values from the national-level model as priors**

In order to calibrate natural history parameters, which are informed by the national estimates,<sup>3</sup> we used the MASS library in R to fit beta distributions to a sample from the posterior distribution of the national-level model to estimate the probability of an incident infection being symptomatic, the probability of transmission, and gamma distributions to the duration of a symptomatic and asymptomatic case. These beta and gamma distributions were then taken as the prior in the regional model.

### **Increasing transmission probability**

To facilitate the observed increasing prevalence trends, we allowed our model to assume a linearly increasing transmission probability during the calibration time period. Two separate rates of increase in transmission probability were calibrated for the heterosexual and MSM populations. The transmission probability at the beginning of the time period ( $T_r$ ) is calibrated directly, while the transmission probability at the end of the time period is calibrated as a rate between 0 and 1 multiplied against  $(1-T_r)$ . This rate of increase parameter is calibrated as a beta distribution.

### **Incidence estimate for MSM**

To provide more information to the model for a reasonable estimate of the incidence rate among MSM, we estimated a 95% confidence interval of the incidence estimate to be between 2 and 20% based on two studies in Atlanta and San Francisco which provide incidence estimates among MSM. This was used in calibration as a gamma likelihood.

Morris et al. 2006<sup>5</sup>. Prospective cohort Study conducted in San Francisco 2001-2003. MSM were tested regardless of symptoms every 6 months. Study population of 603 men was 71% white and 6% black. The study identified a yearly incidence of rectal gonorrhea 3.5% (1.6-7.0%), urethral gonorrhea 1.5% (0.6-3.4%), and pharyngeal gonorrhea 11.7% (8.8-15.3%). Study by Kelley et al (2015)<sup>6</sup> and Sullivan et al (2014)<sup>7</sup> conducted a prospective cohort of 803 of whom 562 were followed up over 2011-2014. The prospective cohort was restricted to HIV-negative population. Incidence for rectal gonorrhea was 9.4 (6.3-13.4) among black men, and 3.7 (2.1-6.1) among white men. Urethral gonorrhea incidence was 2.2 (0.9-4.3) among black men and 0.2 (0.0-1.2) among white men.

### **Removing loss to follow-up**

In the model, screening and treatment are operationalized simultaneously. The model-estimated screening rate represents *the effective screening rate* given a person was tested, not lost to follow-up and received treatment.  $O_{base}$  is then the average duration from infection to testing and treatment initiation for asymptomatic women. In  $O_{base} = \frac{T+D}{(1-f)}$ ,  $T$  is the duration between screening tests,  $f$  is the

proportion LTFU after screening and  $D$  is the average duration between testing and treatment start among those not LTFU. If we prevent LTFU (but do not alter average duration to treatment as in the analysis), we could reduce the duration of infection. Among those not lost to follow-up the mean time to treatment initiation is  $O_{treatall} = T + D = O_{base}(1 - f)$ .

### **Implementing mobile outreach testing scenarios**

The increase in screening via outreach screening was implemented as an average increase in screening across the population. We modified the rate of screening in the model so that there were an additional two screening tests per year among 14% of the population who were assumed to uptake the outreach screening. We also wanted to target high-activity and low-activity populations (HR and LR) differently with the assumption that the outreach screening is able to increase screening among high-activity population specifically. To obtain the different increase in screening between the high- and low-activity populations we calculated a weighted average, so that when 50% of the high-activity population (10% of the total population) are screened, there would be 10% of low-risk population screened to achieve overall 14% screening coverage. In the sensitivity analyses, we maintain the size of the target population at 14% and the increase in screening tests as 2 additional tests per year to assure that a similar number of additional tests are applied across the mobile outreach scenarios making them comparable. The percentage of high-activity individuals who are provided the additional two screening tests per year is adjusted from the 50% to 20% or 40%, and the size of the low-activity population is calculated accordingly.

## Supplementary Results

Model Estimated Proportional Breakdown of Incident Infections Compared to Diagnosed and Reported Cases

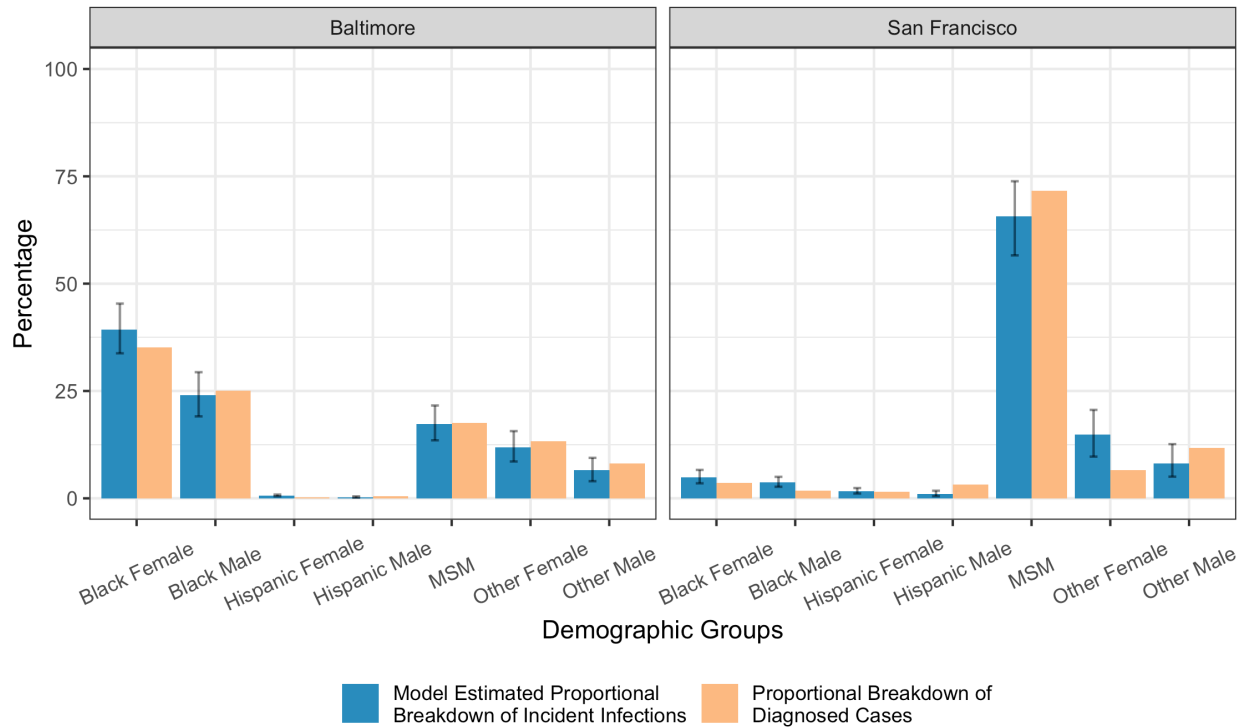

**Figure S1.** Percentage breakdown of new infections estimated to occur on the last calibration year (2017 and 2016 for Baltimore City and San Francisco, respectively).

The bar chart shows the proportion (%) of model-estimated incident infections occurring in each subpopulation (mean and 95% credible interval of the calibrated model). Black male (Non-Hispanic Black), Hispanic Male, and Other Male (non-Hispanic White and other race/ethnicity groups) refer to MSW populations only.

The breakdown of model-predicted incidence closely resembles the breakdown of gonorrhea diagnoses reflecting the influence of the surveillance data on the model calibration. To get the breakdown of diagnoses in men by race/ethnicity (as gonorrhea diagnoses are not reported by sexual orientation), we assumed that for a given MSW race/ethnicity group, their share of diagnoses was:  $(1-M)*R/T$ , where M is the fraction reported to be MSM of male cases (in SSuN), T is total diagnosed infections in men that year, and R is the total diagnoses in men of a given race/ethnicity.

**Table S2.** Model-estimated prevalence, cumulative infections averted and additional tests after 5 years in **Baltimore**.  
HR: coverage among high-activity population, LR: coverage among low-activity population.

| <b>Intervention</b>                        | <b>Prevalence (after 5 years)</b>             | <b>Incident Infections Averted Relative to the Base Case</b> | <b>Additional Tests Relative to the Base Case</b> |
|--------------------------------------------|-----------------------------------------------|--------------------------------------------------------------|---------------------------------------------------|
| Base Case                                  | Mean: 1.4% Median: 1.4%<br>95%CrI: 1.1%, 1.9% | NA                                                           | NA                                                |
| 15-24 Annual Screening                     | Mean: 0.7% Median: 0.7%<br>95%CrI: 0.5%, 0.9% | Mean: 3.1% Median: 2.9%<br>95%CrI: 1.4%, 5.4%                | Mean: 6.7% Median: 6.7%<br>95%CrI: 5.1%, 8.7%     |
| 15-24 Twice-Annual Screening               | Mean: 0.3% Median: 0.3%<br>95%CrI: 0.2%, 0.5% | Mean: 5.4% Median: 5.2%<br>95%CrI: 3.1%, 8.2%                | Mean: 16.6% Median: 16.6%<br>95%CrI: 12.9%, 20.9% |
| Female 15-24 Annual Screening              | Mean: 1.2% Median: 1.2%<br>95%CrI: 1.0%, 1.5% | Mean: 0.5% Median: 0.4%<br>95%CrI: 0.0%, 1.9%                | Mean: 2.4% Median: 2.4%<br>95%CrI: 1.8%, 3.2%     |
| Female 15-24 Twice-Annual Screening        | Mean: 0.7% Median: 0.7%<br>95%CrI: 0.5%, 0.9% | Mean: 2.8% Median: 2.6%<br>95%CrI: 1.5%, 4.8%                | Mean: 7.2% Median: 7.2%<br>95%CrI: 5.5%, 9.0%     |
| MSM Annual Screening                       | Mean: 1.4% Median: 1.4%<br>95%CrI: 1.1%, 1.9% | Mean: -0.0% Median: -0.0%<br>95%CrI: -0.1%, 0.0%             | Mean: 0.3% Median: 0.3%<br>95%CrI: 0.2%, 0.4%     |
| MSM Twice-Annual Screening                 | Mean: 1.4% Median: 1.4%<br>95%CrI: 1.0%, 1.9% | Mean: -0.1% Median: -0.1%<br>95%CrI: -0.5%, 0.3%             | Mean: 0.9% Median: 0.9%<br>95%CrI: 0.7%, 1.1%     |
| MSM Quarter-Annual Screening               | Mean: 1.3% Median: 1.3%<br>95%CrI: 1.0%, 1.8% | Mean: 0.1% Median: 0.1%<br>95%CrI: -1.1%, 1.2%               | Mean: 2.1% Median: 2.1%<br>95%CrI: 1.6%, 2.6%     |
| Mobile Outreach Testing, 20% HR, 13.33% LR | Mean: 1.1% Median: 1.1%<br>95%CrI: 0.9%, 1.4% | Mean: 2.6% Median: 2.5%<br>95%CrI: 1.4%, 4.5%                | Mean: 3.8% Median: 3.7%<br>95%CrI: 2.6%, 5.8%     |
| Mobile Outreach Testing, 40% HR, 11.11% LR | Mean: 1.0% Median: 1.0%<br>95%CrI: 0.7%, 1.3% | Mean: 3.5% Median: 3.3%<br>95%CrI: 2.0%, 5.8%                | Mean: 3.8% Median: 3.7%<br>95%CrI: 2.6%, 5.8%     |
| Mobile Outreach Testing, 50% HR, 10% LR    | Mean: 0.9% Median: 0.9%<br>95%CrI: 0.7%, 1.2% | Mean: 3.9% Median: 3.7%<br>95%CrI: 2.3%, 6.3%                | Mean: 3.8% Median: 3.7%<br>95%CrI: 2.6%, 5.8%     |
| Remove 10% LTFU, 20% MSW                   | Mean: 1.2% Median: 1.2%<br>95%CrI: 0.9%, 1.7% | Mean: 0.7% Median: 0.7%<br>95%CrI: 0.4%, 1.2%                | NA                                                |
| Remove 10% LTFU                            | Mean: 1.3% Median: 1.3%<br>95%CrI: 0.9%, 1.7% | Mean: 0.5% Median: 0.5%<br>95%CrI: 0.3%, 0.9%                | NA                                                |
| Remove 20% LTFU                            | Mean: 1.1% Median: 1.1%<br>95%CrI: 0.8%, 1.5% | Mean: 1.1% Median: 1.1%<br>95%CrI: 0.6%, 1.8%                | NA                                                |

**Table S3.** Model-estimated prevalence, cumulative infections averted and additional tests after 5 years in **San Francisco**.  
HR: coverage among high-activity population, LR: coverage among low-activity population.

| <b>Intervention</b>                        | <b>Prevalence (after 5 years)</b>             | <b>Incident Infections Averted Relative to the Base Case</b> | <b>Additional Tests Relative to the Base Case</b> |
|--------------------------------------------|-----------------------------------------------|--------------------------------------------------------------|---------------------------------------------------|
| Base Case                                  | Mean: 1.2% Median: 1.1%<br>95%CrI: 0.9%, 1.7% | NA                                                           | NA                                                |
| 15-24 Annual Screening                     | Mean: 1.0% Median: 1.0%<br>95%CrI: 0.8%, 1.5% | Mean: 0.7% Median: 0.6%<br>95%CrI: 0.2%, 1.9%                | Mean: 4.3% Median: 4.1%<br>95%CrI: 3.0%, 6.1%     |
| 15-24 Twice-Annual Screening               | Mean: 0.8% Median: 0.8%<br>95%CrI: 0.6%, 1.2% | Mean: 2.9% Median: 2.9%<br>95%CrI: 0.6%, 5.5%                | Mean: 12.5% Median: 12.1%<br>95%CrI: 9.4%, 16.8%  |
| Female 15-24 Annual Screening              | Mean: 1.1% Median: 1.1%<br>95%CrI: 0.8%, 1.6% | Mean: 0.3% Median: 0.3%<br>95%CrI: 0.1%, 1.0%                | Mean: 2.3% Median: 2.2%<br>95%CrI: 1.5%, 3.3%     |
| Female 15-24 Twice-Annual Screening        | Mean: 1.0% Median: 1.0%<br>95%CrI: 0.7%, 1.4% | Mean: 1.2% Median: 1.1%<br>95%CrI: 0.4%, 2.6%                | Mean: 6.4% Median: 6.2%<br>95%CrI: 4.7%, 8.7%     |
| MSM Annual Screening                       | Mean: 1.1% Median: 1.1%<br>95%CrI: 0.8%, 1.6% | Mean: 0.2% Median: 0.1%<br>95%CrI: 0.0%, 0.8%                | Mean: 1.1% Median: 1.0%<br>95%CrI: 0.6%, 1.6%     |
| MSM Twice-Annual Screening                 | Mean: 0.7% Median: 0.7%<br>95%CrI: 0.4%, 1.2% | Mean: 5.1% Median: 5.3%<br>95%CrI: -0.2%, 9.1%               | Mean: 3.5% Median: 3.4%<br>95%CrI: 2.6%, 4.7%     |
| MSM Quarter-Annual Screening               | Mean: 0.5% Median: 0.4%<br>95%CrI: 0.2%, 1.0% | Mean: 10.8% Median: 11.1%<br>95%CrI: 1.2%, 17.8%             | Mean: 8.3% Median: 8.2%<br>95%CrI: 6.4%, 11.1%    |
| Mobile Outreach Testing, 20% HR, 13.33% LR | Mean: 1.0% Median: 1.0%<br>95%CrI: 0.8%, 1.3% | Mean: 2.7% Median: 2.5%<br>95%CrI: 0.6%, 6.0%                | Mean: 3.8% Median: 3.7%<br>95%CrI: 2.4%, 5.7%     |
| Mobile Outreach Testing, 40% HR, 11.11% LR | Mean: 0.9% Median: 0.9%<br>95%CrI: 0.7%, 1.2% | Mean: 3.8% Median: 3.6%<br>95%CrI: 0.8%, 7.9%                | Mean: 3.8% Median: 3.7%<br>95%CrI: 2.4%, 5.8%     |
| Mobile Outreach Testing, 50% HR, 10% LR    | Mean: 0.9% Median: 0.9%<br>95%CrI: 0.7%, 1.2% | Mean: 4.3% Median: 4.1%<br>95%CrI: 0.9%, 8.7%                | Mean: 3.8% Median: 3.7%<br>95%CrI: 2.4%, 5.8%     |
| Remove 10% LTFU, 20% MSW                   | Mean: 1.0% Median: 1.0%<br>95%CrI: 0.7%, 1.4% | Mean: 1.3% Median: 1.2%<br>95%CrI: 0.2%, 2.4%                | NA                                                |
| Remove 10% LTFU                            | Mean: 1.0% Median: 1.0%<br>95%CrI: 0.8%, 1.5% | Mean: 1.0% Median: 1.0%<br>95%CrI: 0.1%, 1.7%                | NA                                                |
| Remove 20% LTFU                            | Mean: 0.9% Median: 0.9%<br>95%CrI: 0.7%, 1.3% | Mean: 2.1% Median: 2.1%<br>95%CrI: 0.2%, 3.8%                | NA                                                |

## **Sensitivity analysis on the population-level impact of increasing screening for MSM**

There is uncertainty in what impact screening of MSM has at population-level particularly given the limited data available. We aimed to better understand how screening at different levels impacted the transmission dynamics of the total model population.

Figures S2 and S3 demonstrate the impact of increasing screening frequency in MSM from 1 per year to 5 times per year. When the rate of recovery is increased via screening in a population with high force of infection, the newly susceptible individuals get rapidly re-infected. Therefore, reducing duration of infection via screening can result in lower prevalence but more infections acquired, as presented for Baltimore in Figure S3.

In Baltimore, MSM are a small proportion (4%<sup>1</sup>) of the population with gonorrhea transmission still sustained in other populations when screening is increased only among MSM. Only when screening frequency is at very high intensity, do we estimate that there may be infections averted at population level (Figure S2), but even then there is substantive uncertainty in population-level outcomes with simulations spread between infections averted and infections acquired compared to the calibrated base case model.

Conversely, in San Francisco, MSM form a larger proportion of the total population (18.5%<sup>1</sup>), and they have the largest burden of incident gonococcal infections (Figure S1). When screening is increased in MSM in San Francisco, this targets majority of the population with gonorrhea infection, and population-level benefits are observed even when the screening frequency is only modestly above that estimated in the calibrated base case model.

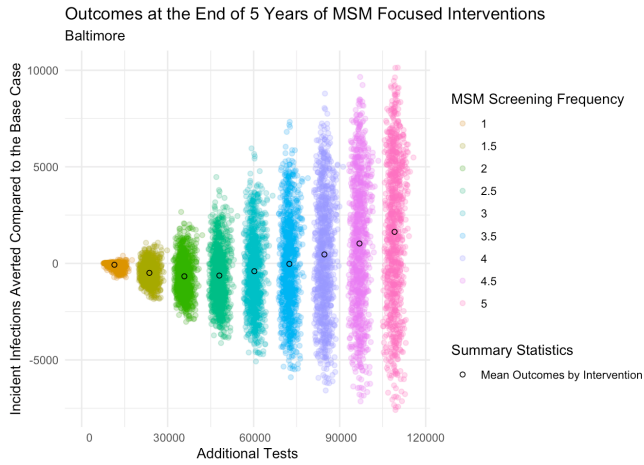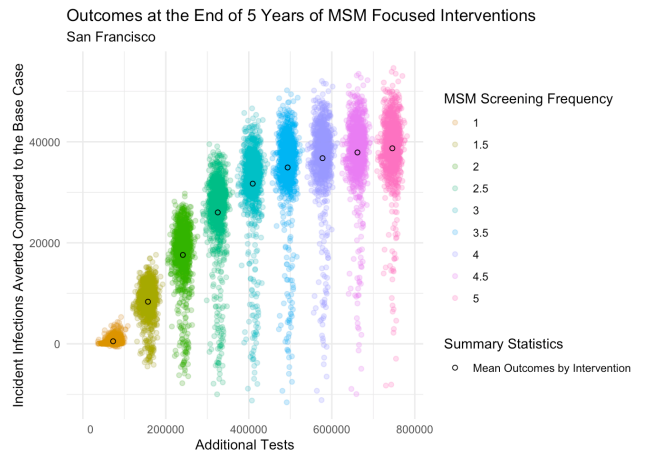

**Figure S2.** Sensitivity analysis of the impact of screening MSM. Interventions vary screening from once-a-year (1x) to 5-times-a-year (5x). Outputs examined are cumulative infections averted (y-axis) and cumulative number of additional tests needed compared to base case (calibrated model) over the five-year intervention period. Each simulation is presented as a point on the scatter plot with mean of the scenarios presented as black circles.



## A) Baltimore

### MSM Focused Screening Interventions in Baltimore

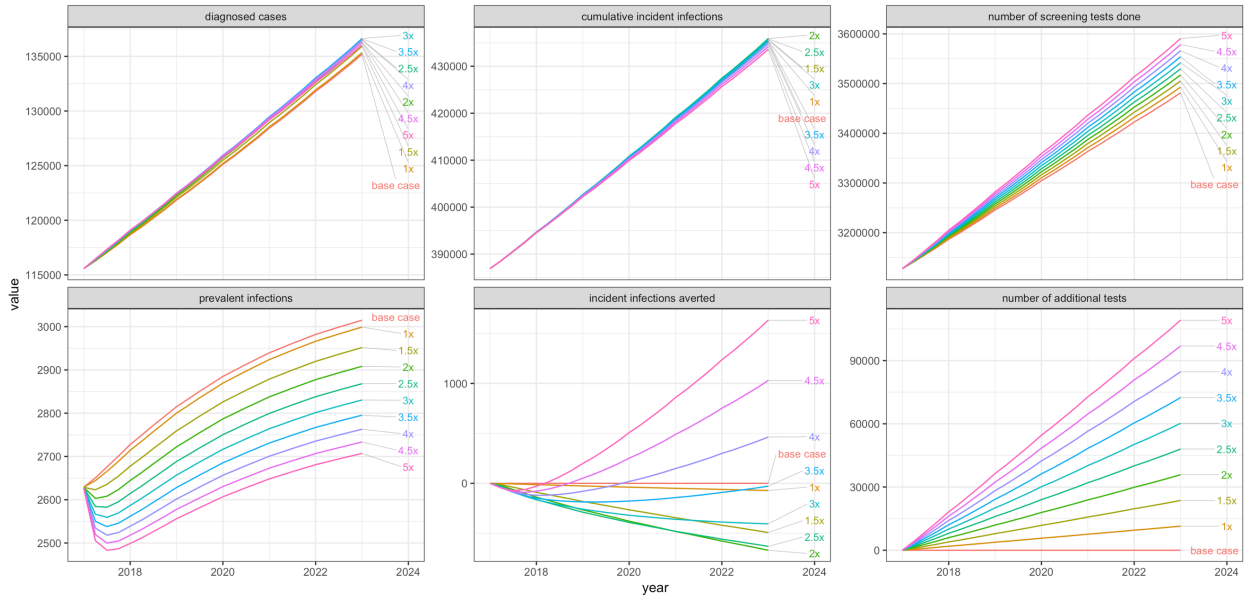

## B) San Francisco

### MSM Focused Screening Interventions in San Francisco

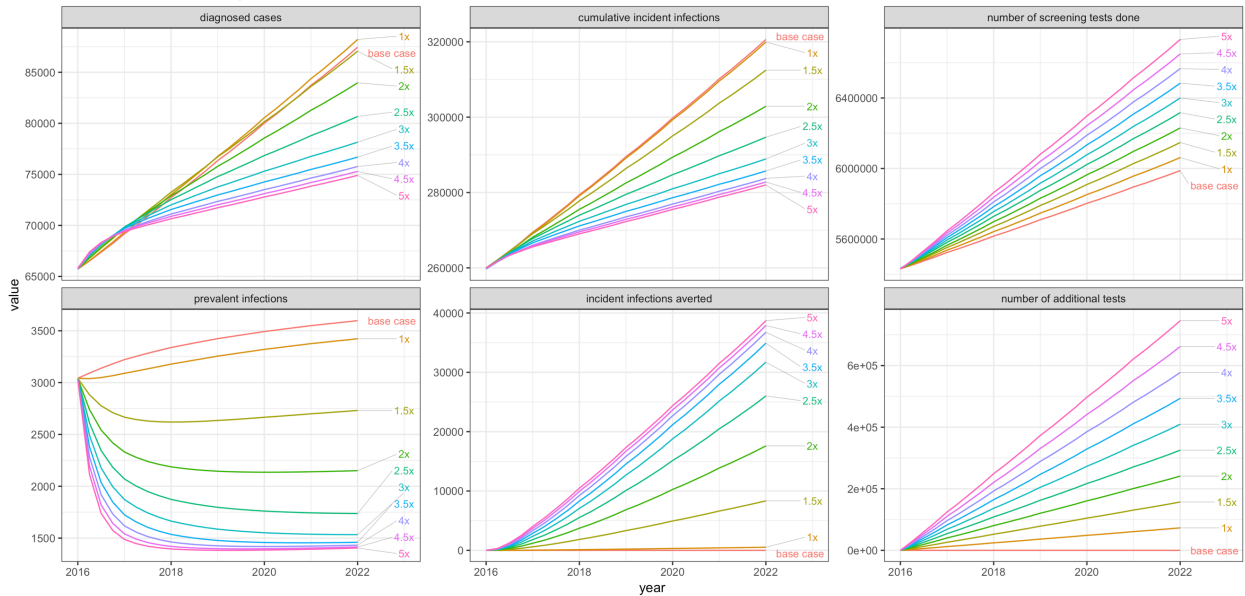

**Figure S3.** Sensitivity analysis of the impact of screening MSM among the total population. Interventions vary screening from once-a-year (1x) to 5-times-a-year (5x). Outputs examined are model-estimated mean of diagnosed infections, cumulative infections, number of screening tests done, prevalence, infections averted and number of additional tests needed compared to base case. The numbers presented as absolute, or absolute difference (where comparison to base case is made). Note that the y-axis does not start at zero in all the panels.

## Sensitivity analysis for the mobile outreach testing

We examined the impact of lower uptake of screening among high-activity population (those with the highest partner change rate), while maintaining the overall additional number of tests similar across the analyses. Reduction in uptake among high-activity population screened reduces the overall impact of the intervention.

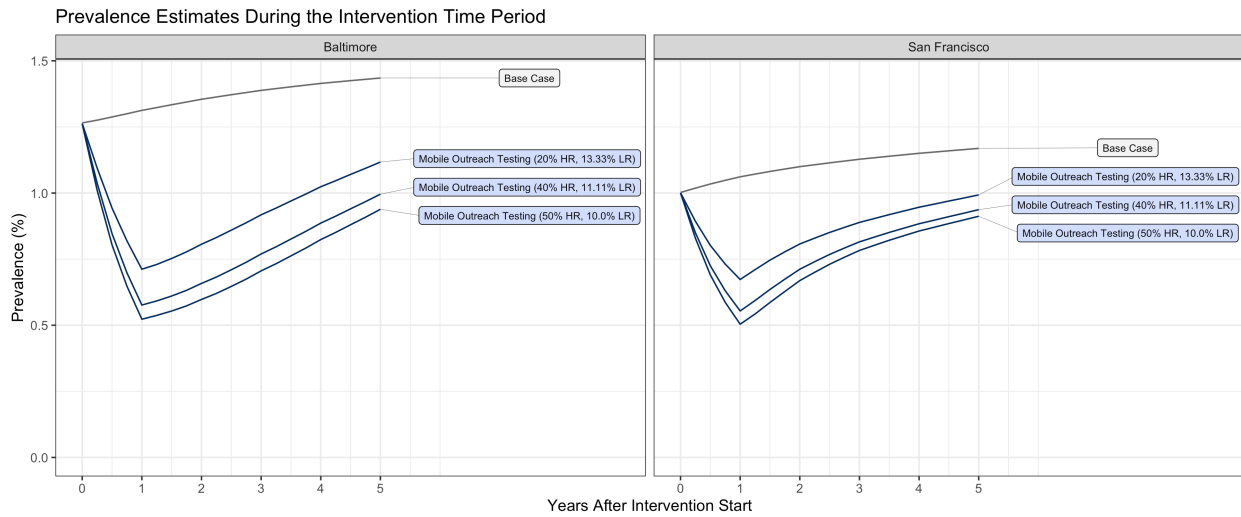

**Figure S4.** Population prevalence estimates per 100 persons during the intervention period, presented as the mean of the calibrated model (base case) and for the counterfactual mobile outreach interventions.

Footnote: HR: coverage among high-activity population, LR: coverage among low-activity population.

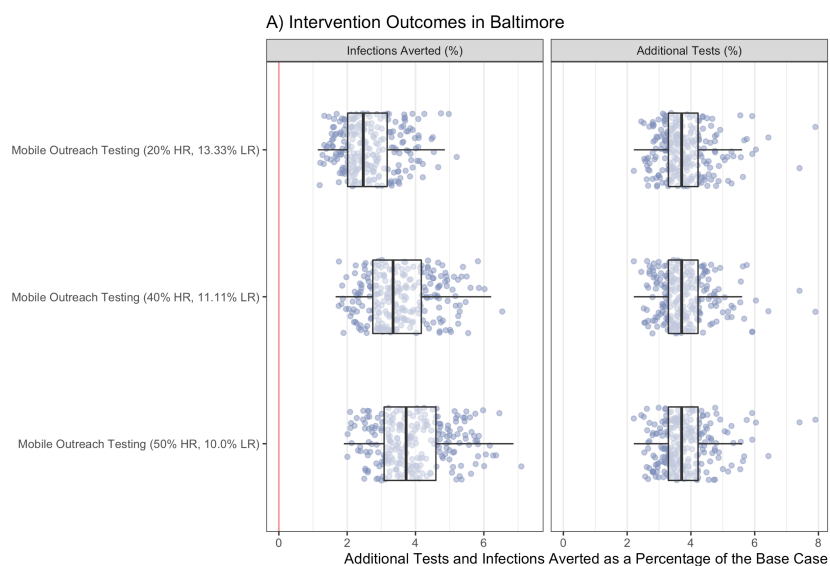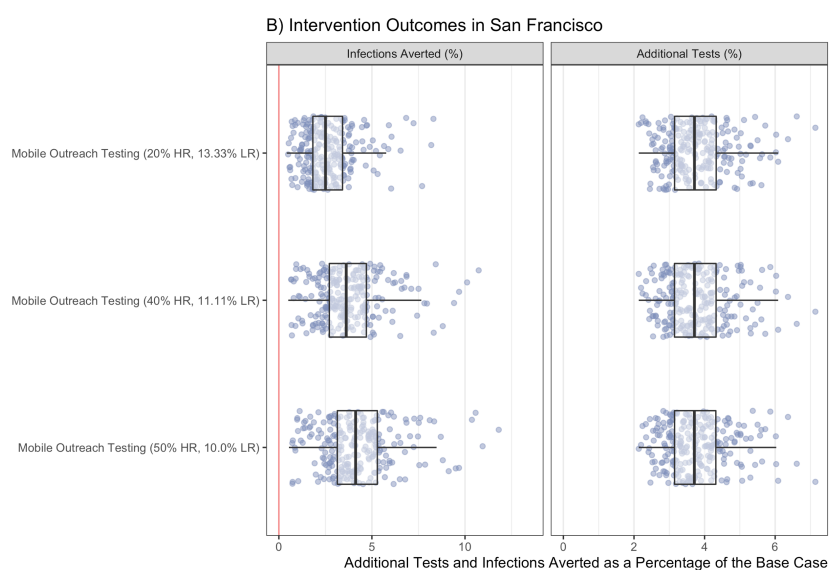

**Figure S5.** Cumulative infections averted and additional tests relative to the calibrated model (%) for the population in A) Baltimore City and B) San Francisco for the 5-year time period.

Footnote: Scatter plot presents a sample of 250 model simulations to display the underlying distribution. Boxplot use the full 1000 simulations.

HR: coverage among high-activity population, LR: coverage among low-activity population.

## References

1. Grey JA, Bernstein KT, Sullivan PS, Purcell DW, Chesson HW, Gift TL, et al. Estimating the Population Sizes of Men Who Have Sex With Men in US States and Counties Using Data From the American Community Survey. *JMIR public Heal Surveill.* 2016;2(1):e14.
2. Centers for Disease Control and Prevention (CDC). National Center for Health Statistics (NCHS). National Survey of Family Growth. U.S. Department of Health and Human Services, Centers for Disease Control and Prevention;
3. Tuite AR, Rönn MM, Wolf EE, Gift T, Chesson HW, Berruti A, et al. Estimated impact of screening on gonorrhea epidemiology in the United States: insights from a mathematical model. *Sex Transm Dis.* 2018;45(11):713–22.
4. Camacho A, Funk S. fitR: Tool box for fitting dynamic infectious disease models to time series. [Internet]. Available from: <https://sbfnk.github.io/fitR/index.html>
5. Morris SR, Klausner JD, Buchbinder SP, Wheeler SL, Koblin B, Coates T, et al. Prevalence and Incidence of Pharyngeal Gonorrhea in a Longitudinal Sample of Men Who Have Sex with Men: The EXPLORE Study. *Clin Infect Dis.* 2006 Nov 15;43(10):1284–9.
6. Kelley CF, Vaughan AS, Luisi N, Sanchez TH, Salazar LF, Frew PM, et al. The Effect of High Rates of Bacterial Sexually Transmitted Infections on HIV Incidence in a Cohort of Black and White Men Who Have Sex with Men in Atlanta, Georgia. *AIDS Res Hum Retroviruses.* 2015 Jun;31(6):587–92.
7. Sullivan PS, Peterson J, Rosenberg ES, Kelley CF, Cooper H, Vaughan A, et al. Understanding racial HIV/STI disparities in black and white men who have sex with men: A multilevel approach. *PLoS One.* 2014;9(3).
