# Supplementary material for: The Potential Population-Level Impact of Different Gonorrhea Screening Strategies in Baltimore and San Francisco: An Exploratory Mathematical Modeling Analysis
Source: PubMed Central journal article supplement — Sex Transm Dis. 2019 Dec 12;47(3):143–50. doi: 10.1097/OLQ.0000000000001108 (PMC7012354; doi:10.1097/olq.0000000000001108), 2019-12-12
Supplement: olq-47-143-s004.pdf [file olq-47-143-s004.pdf]

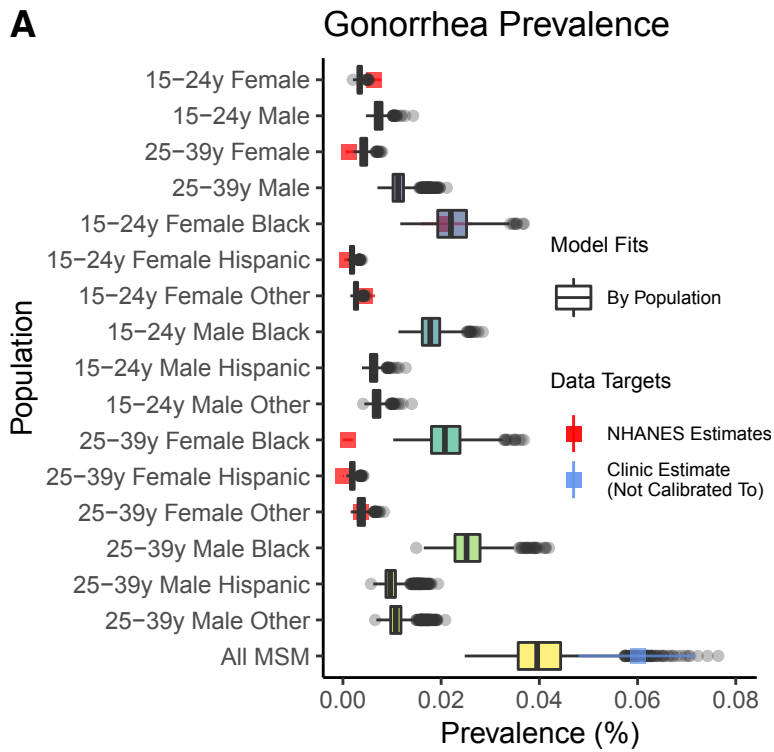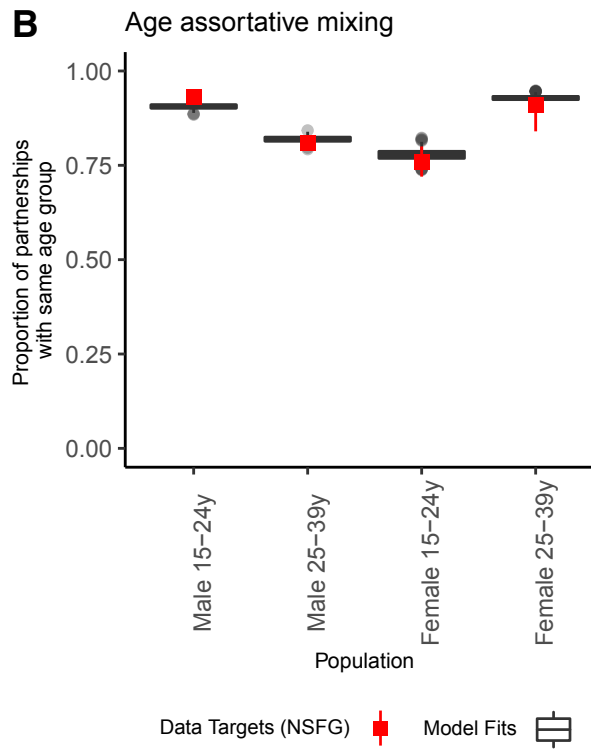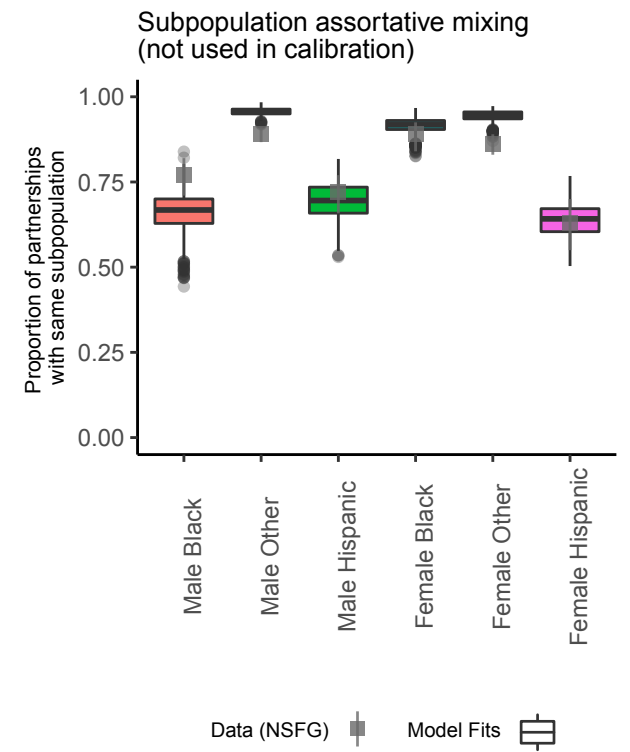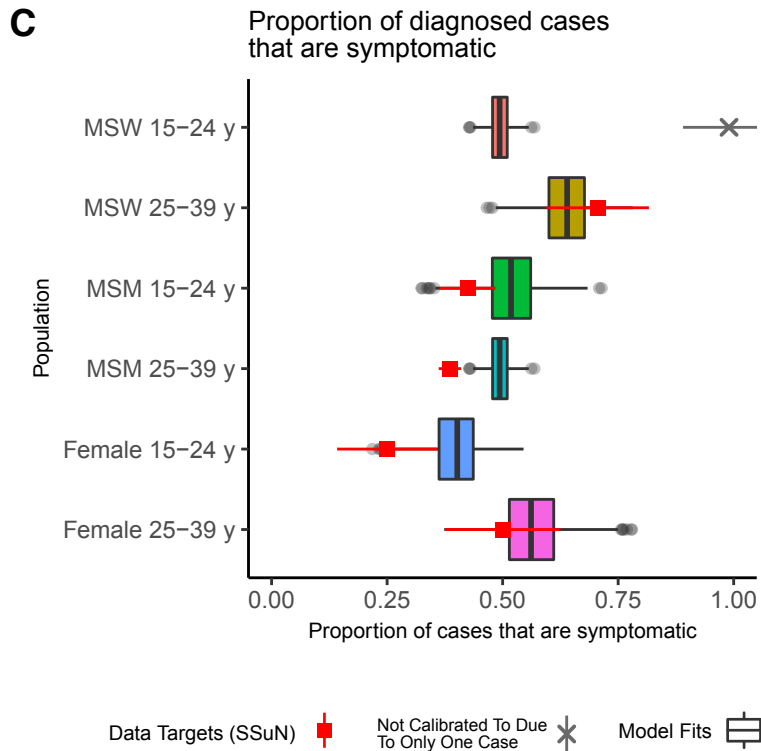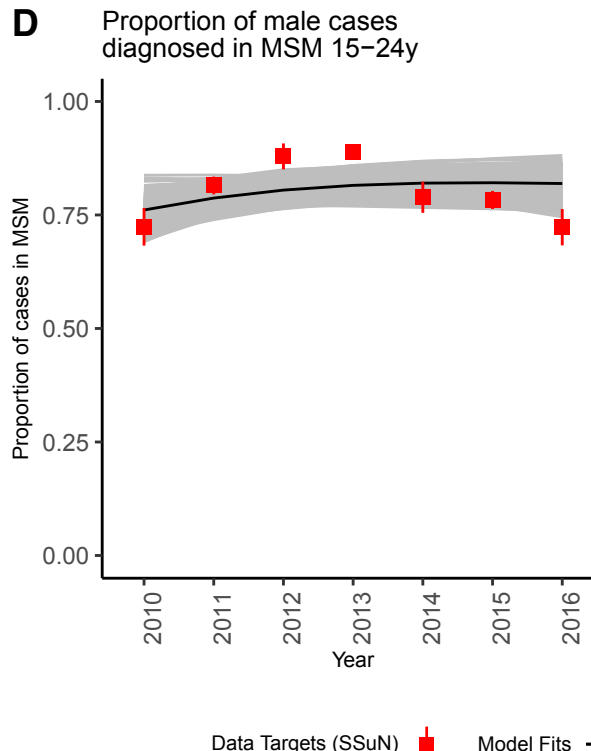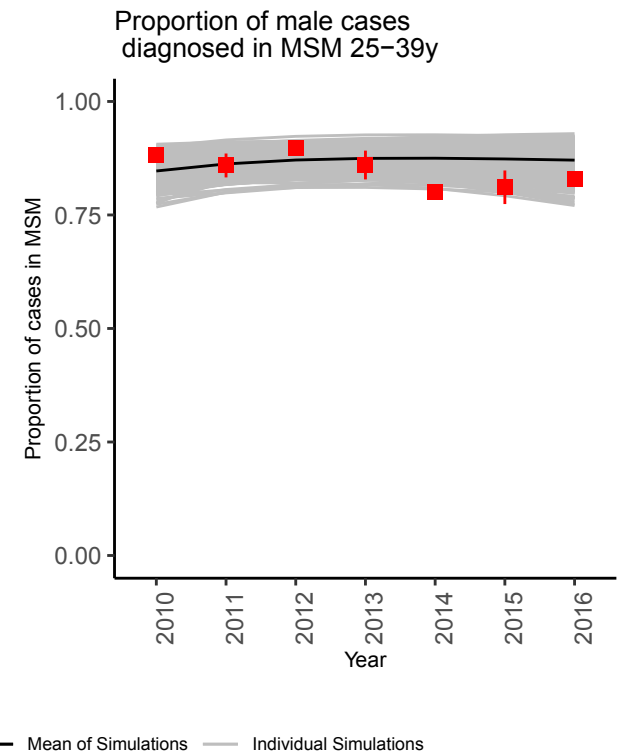

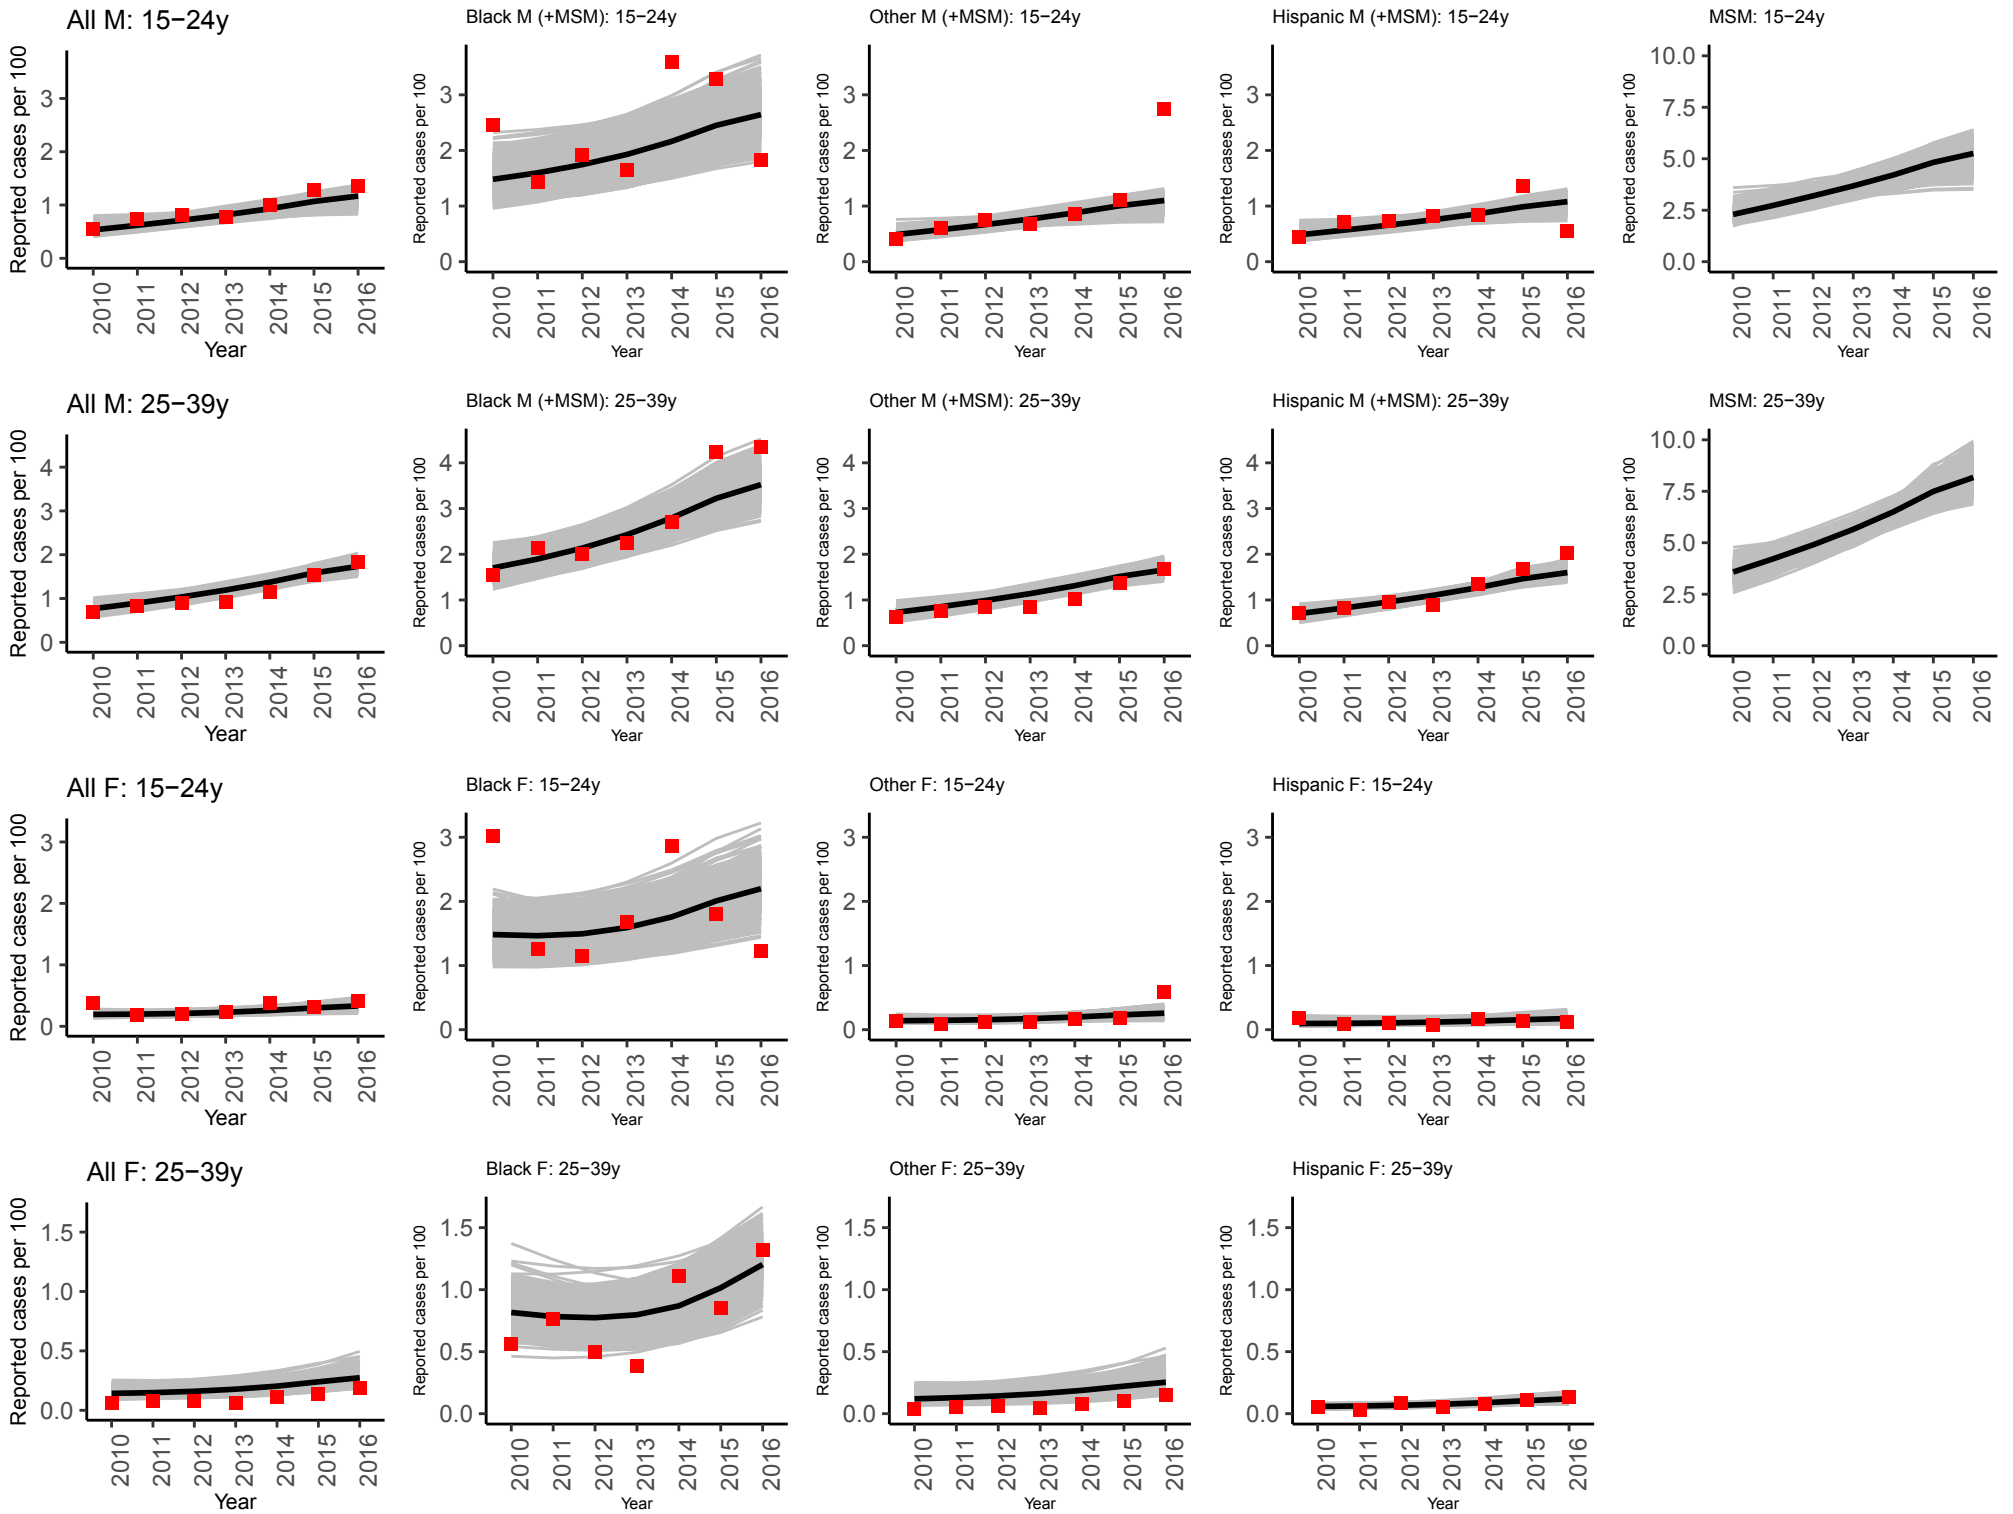

Data Targets  Reported Gonorrhea Diagnoses per 100 Population

Black vs all M: 15-24

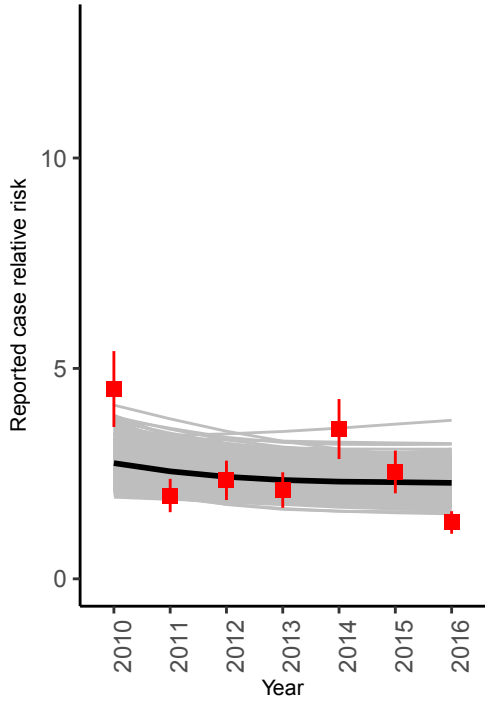

Black vs all F: 15-24

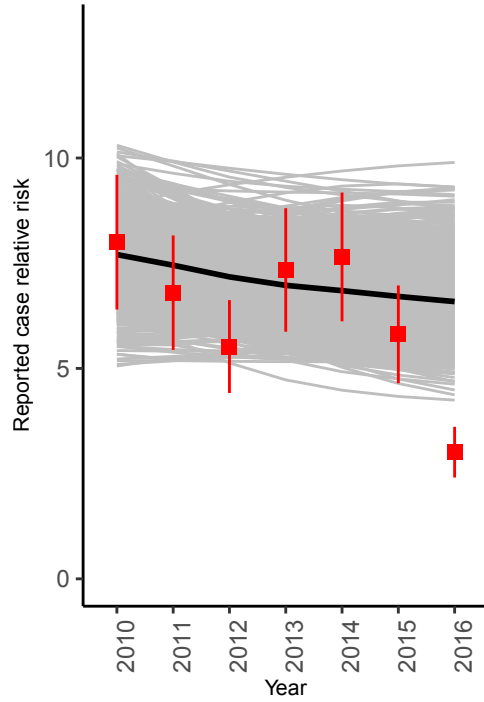

Hispanic vs all M: 15-24

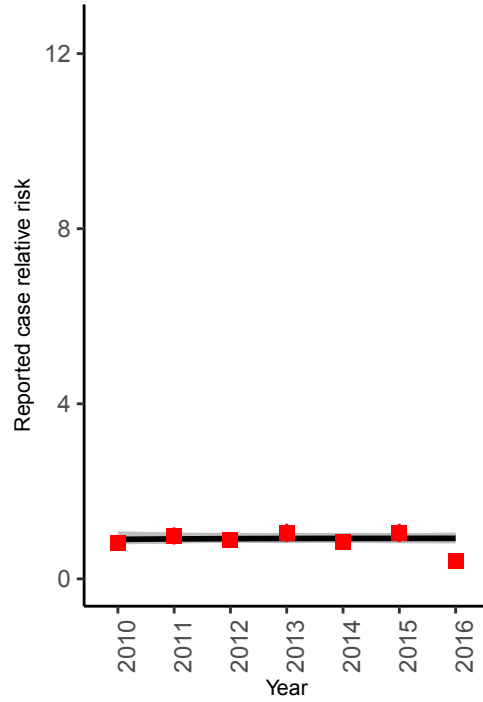

Hispanic vs all F: 15-24

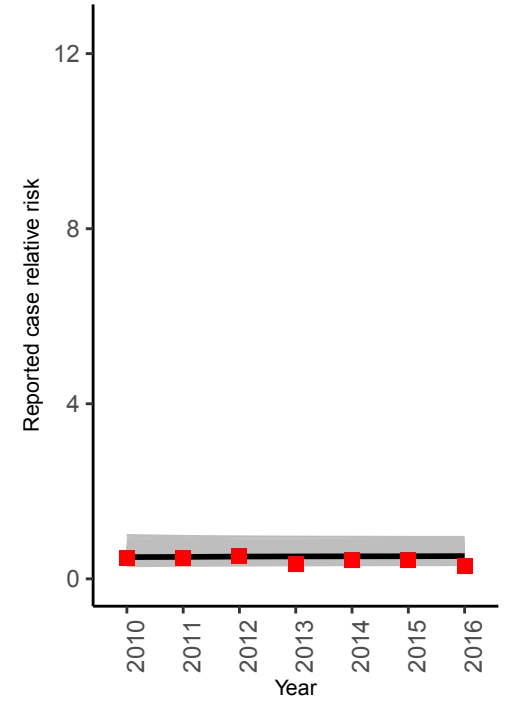

Black vs all M: 25-39

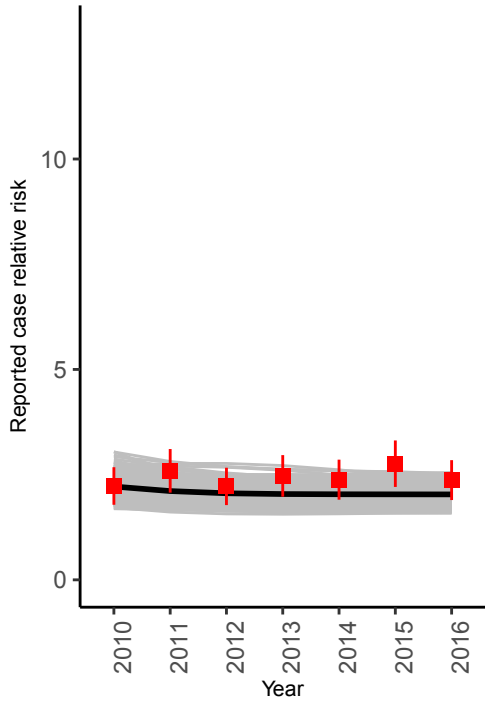

Black vs all F: 25-39

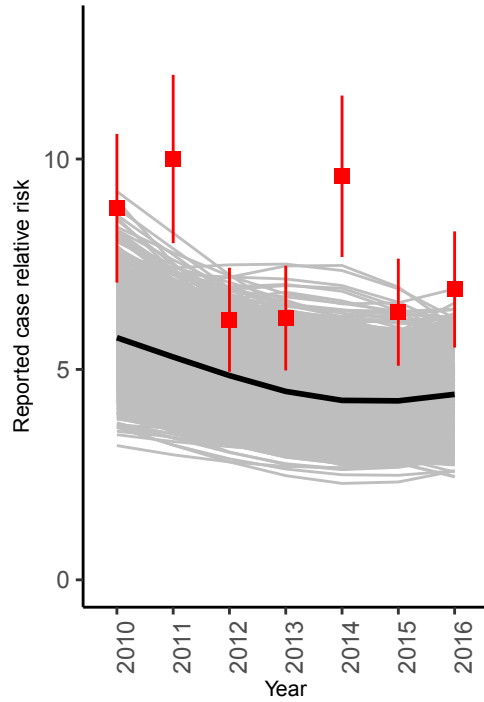

Hispanic vs all M: 25-39

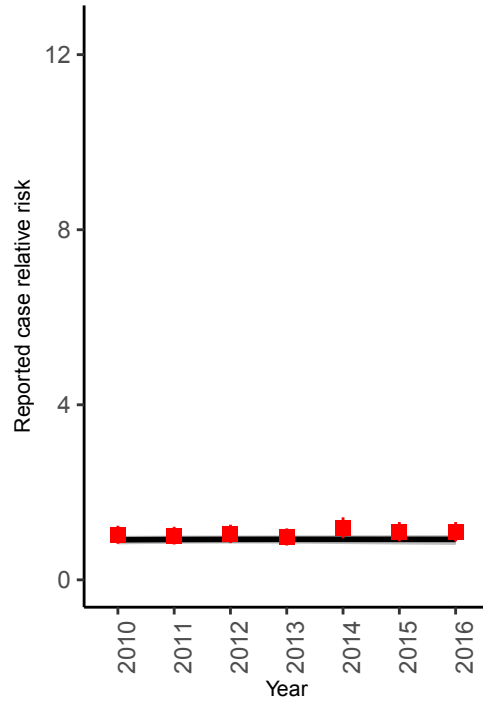

Hispanic vs all F: 25-39

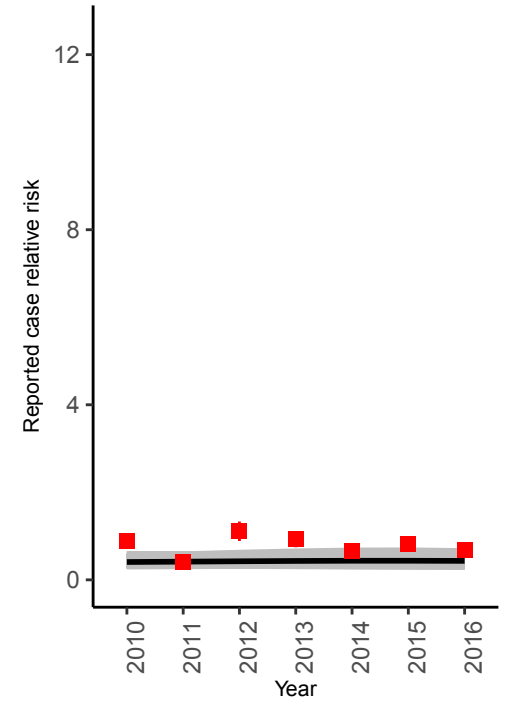

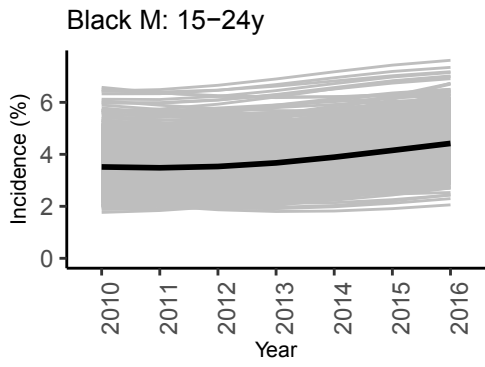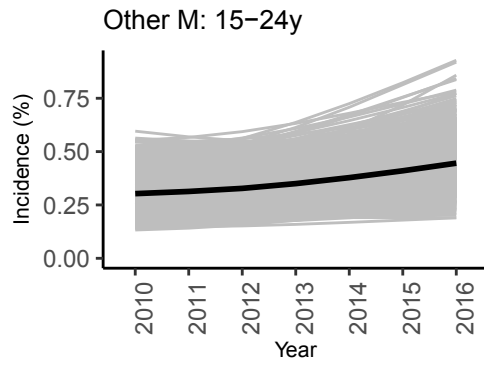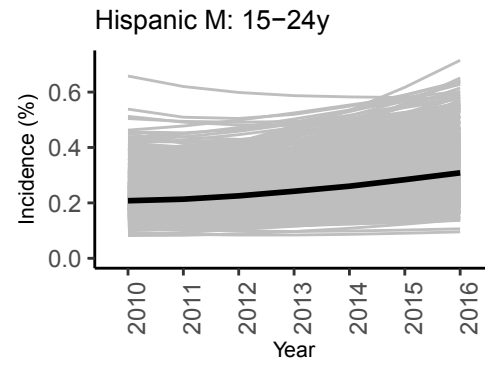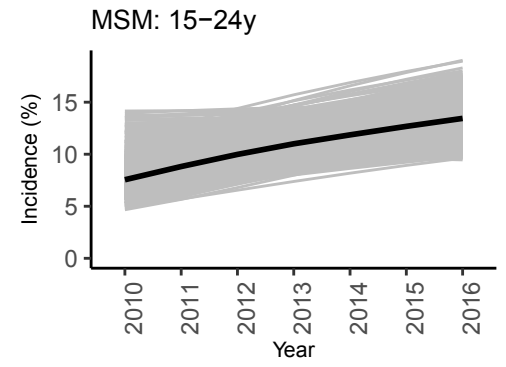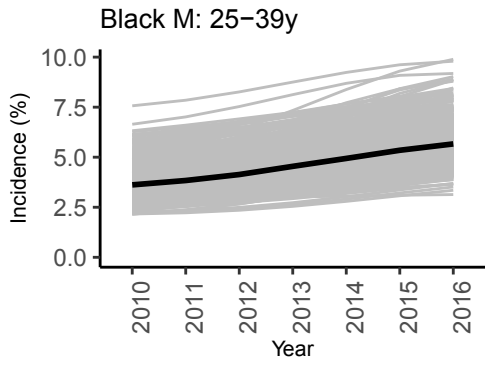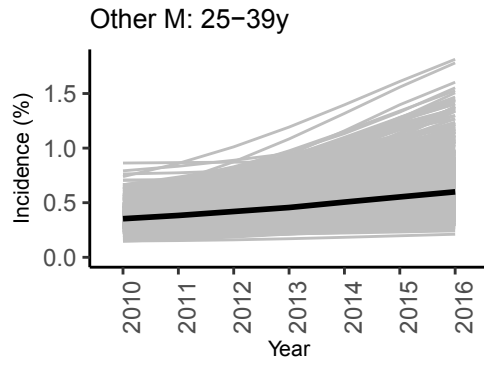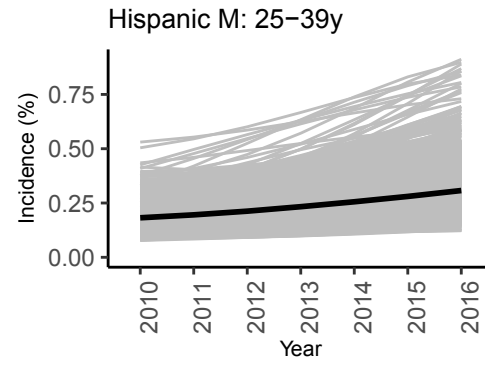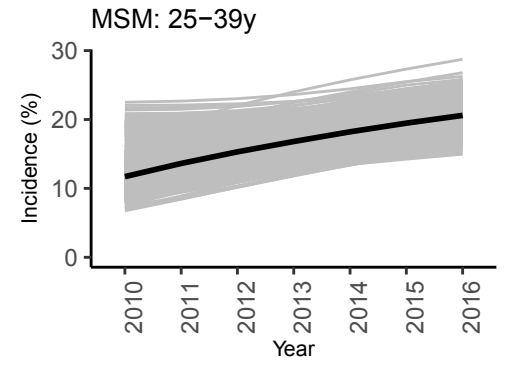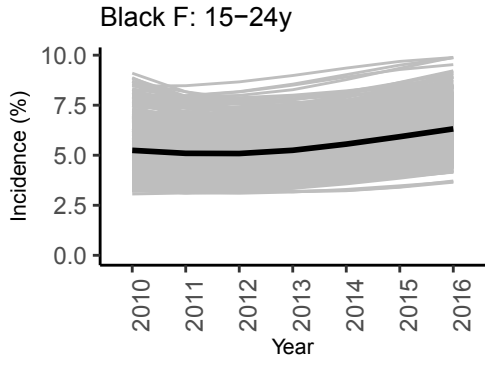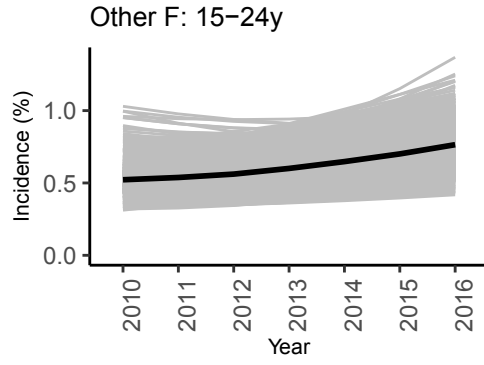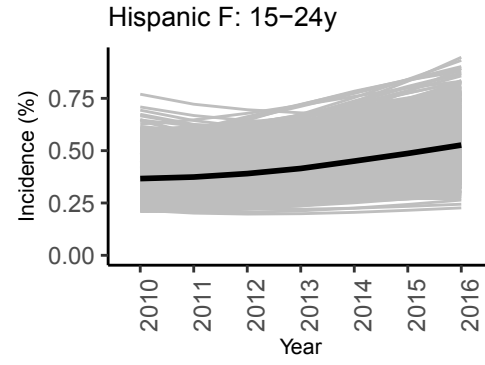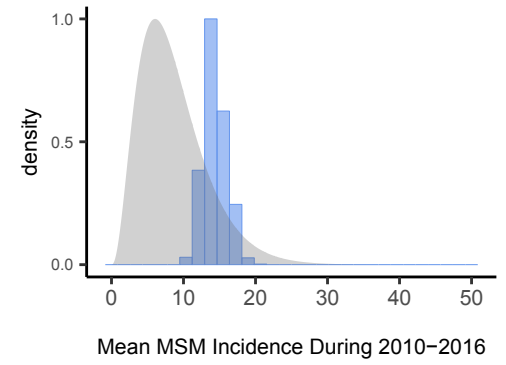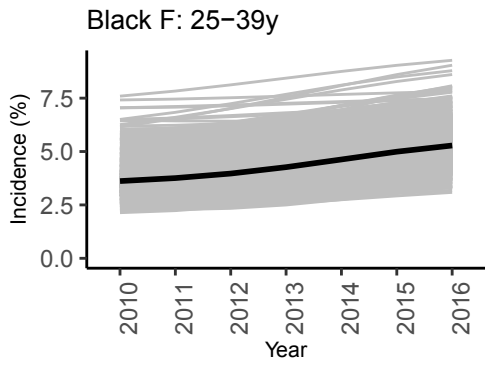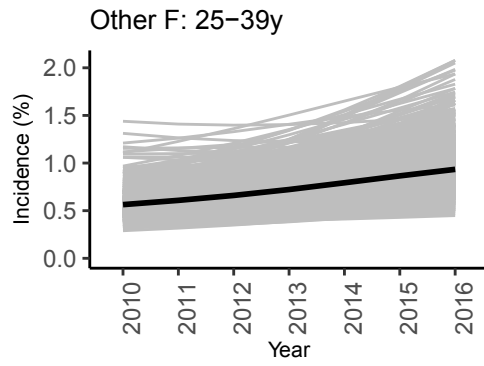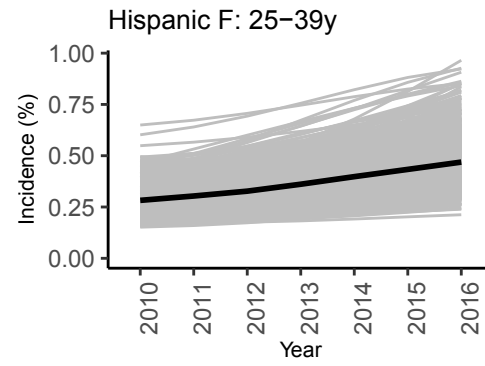

Model Outcomes — Median Simulation Outcome — Individual Simulations

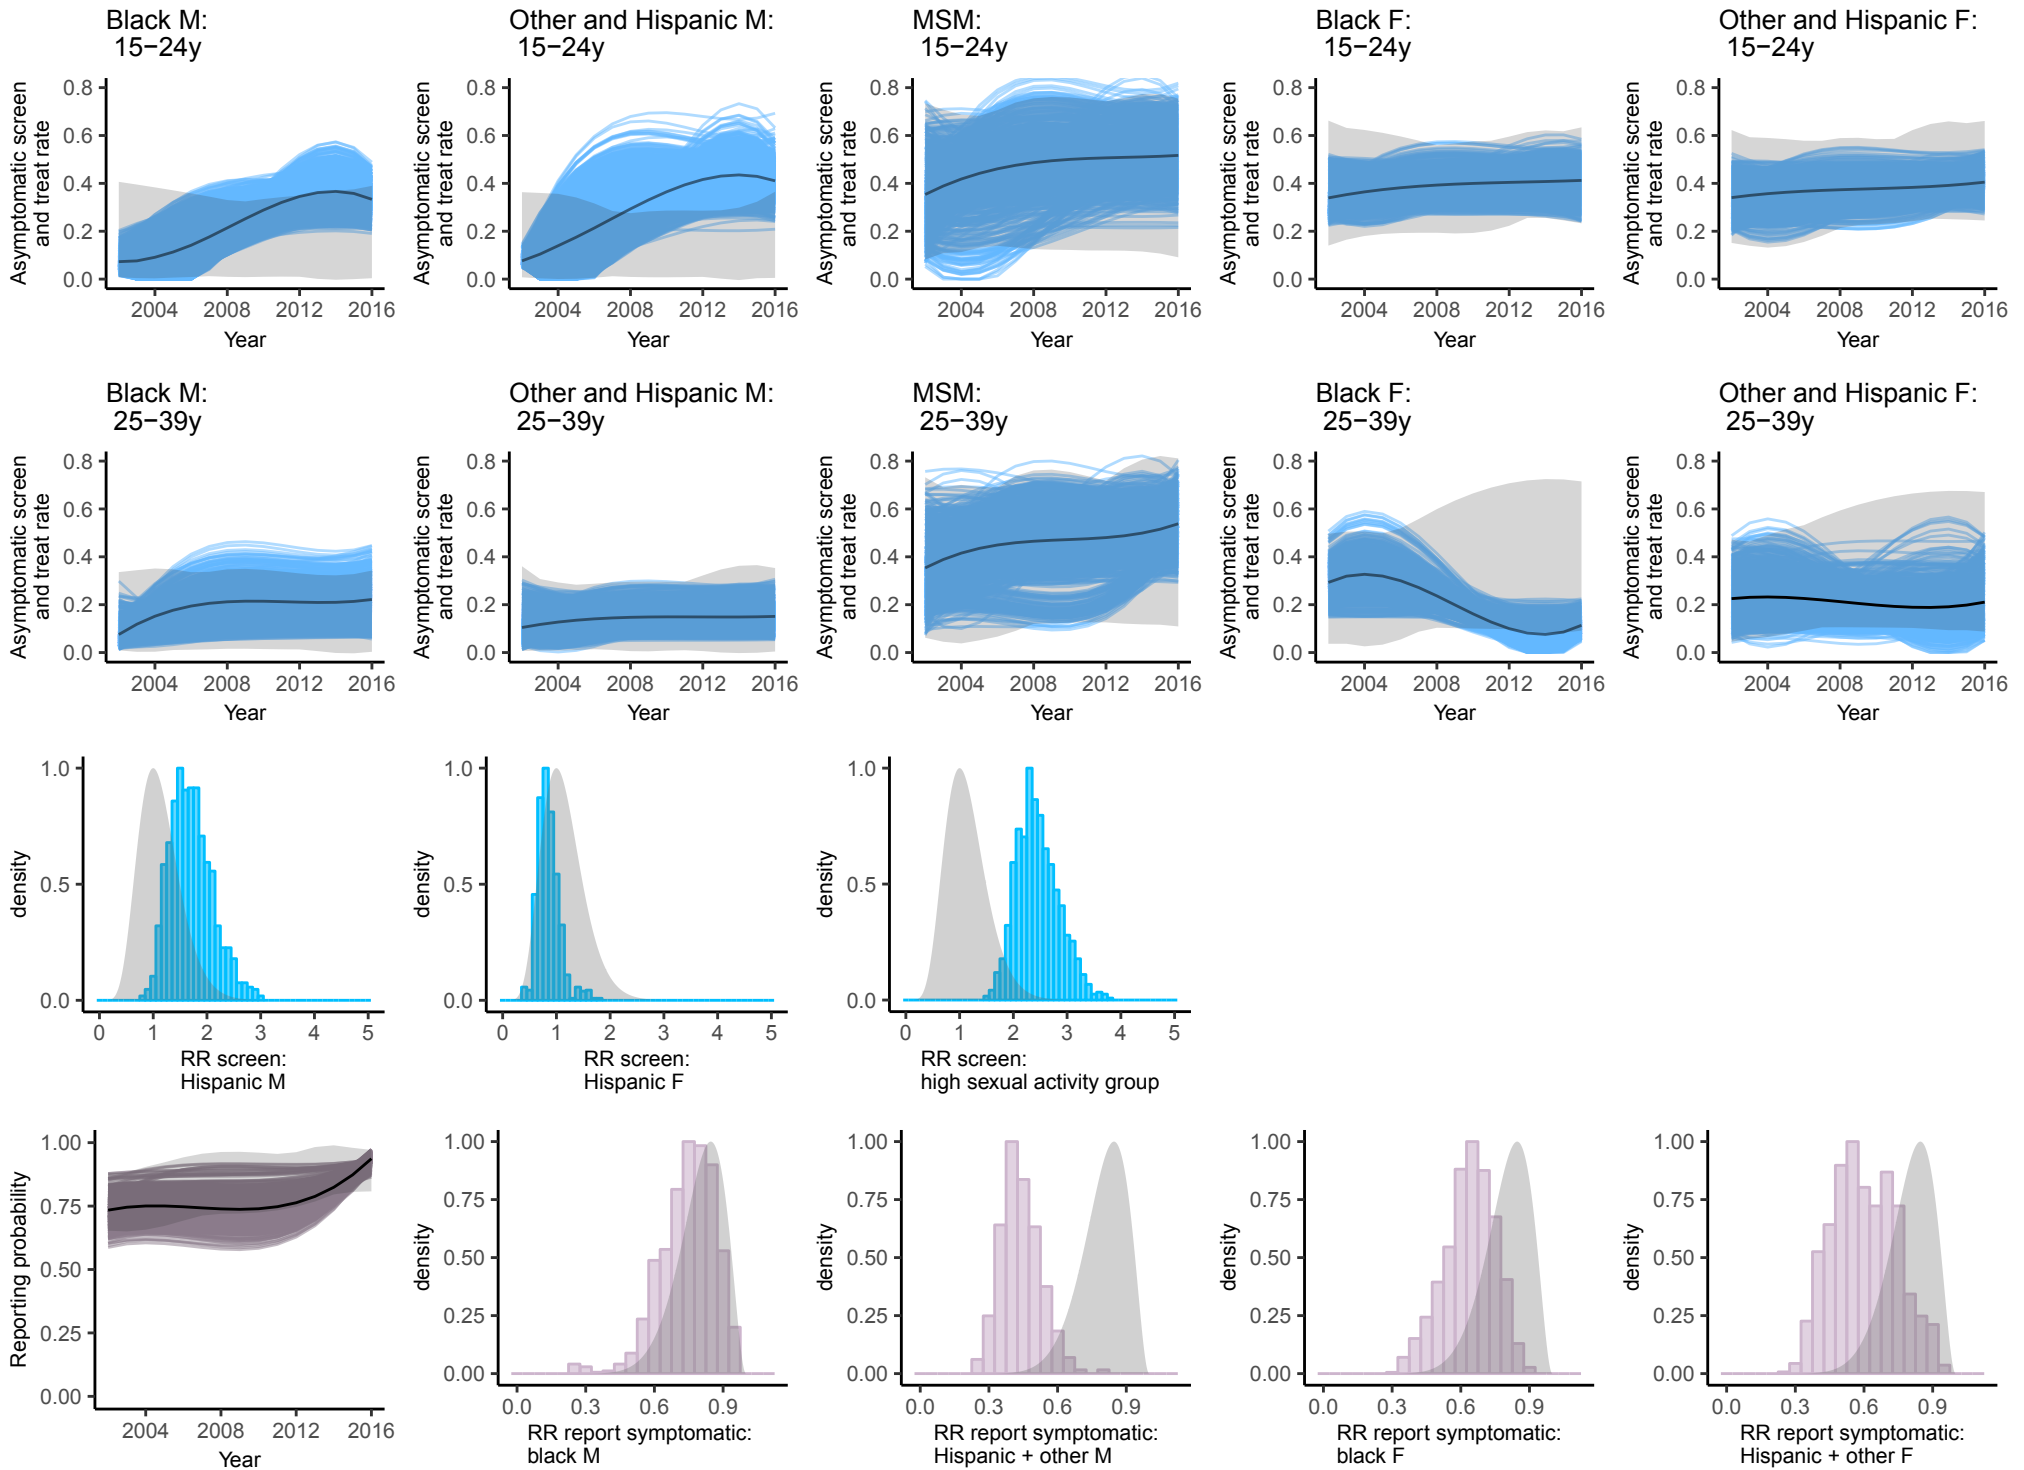

Priors/posteriors (1/3)

Prior distributions are represented in grey, posterior samples represented in color

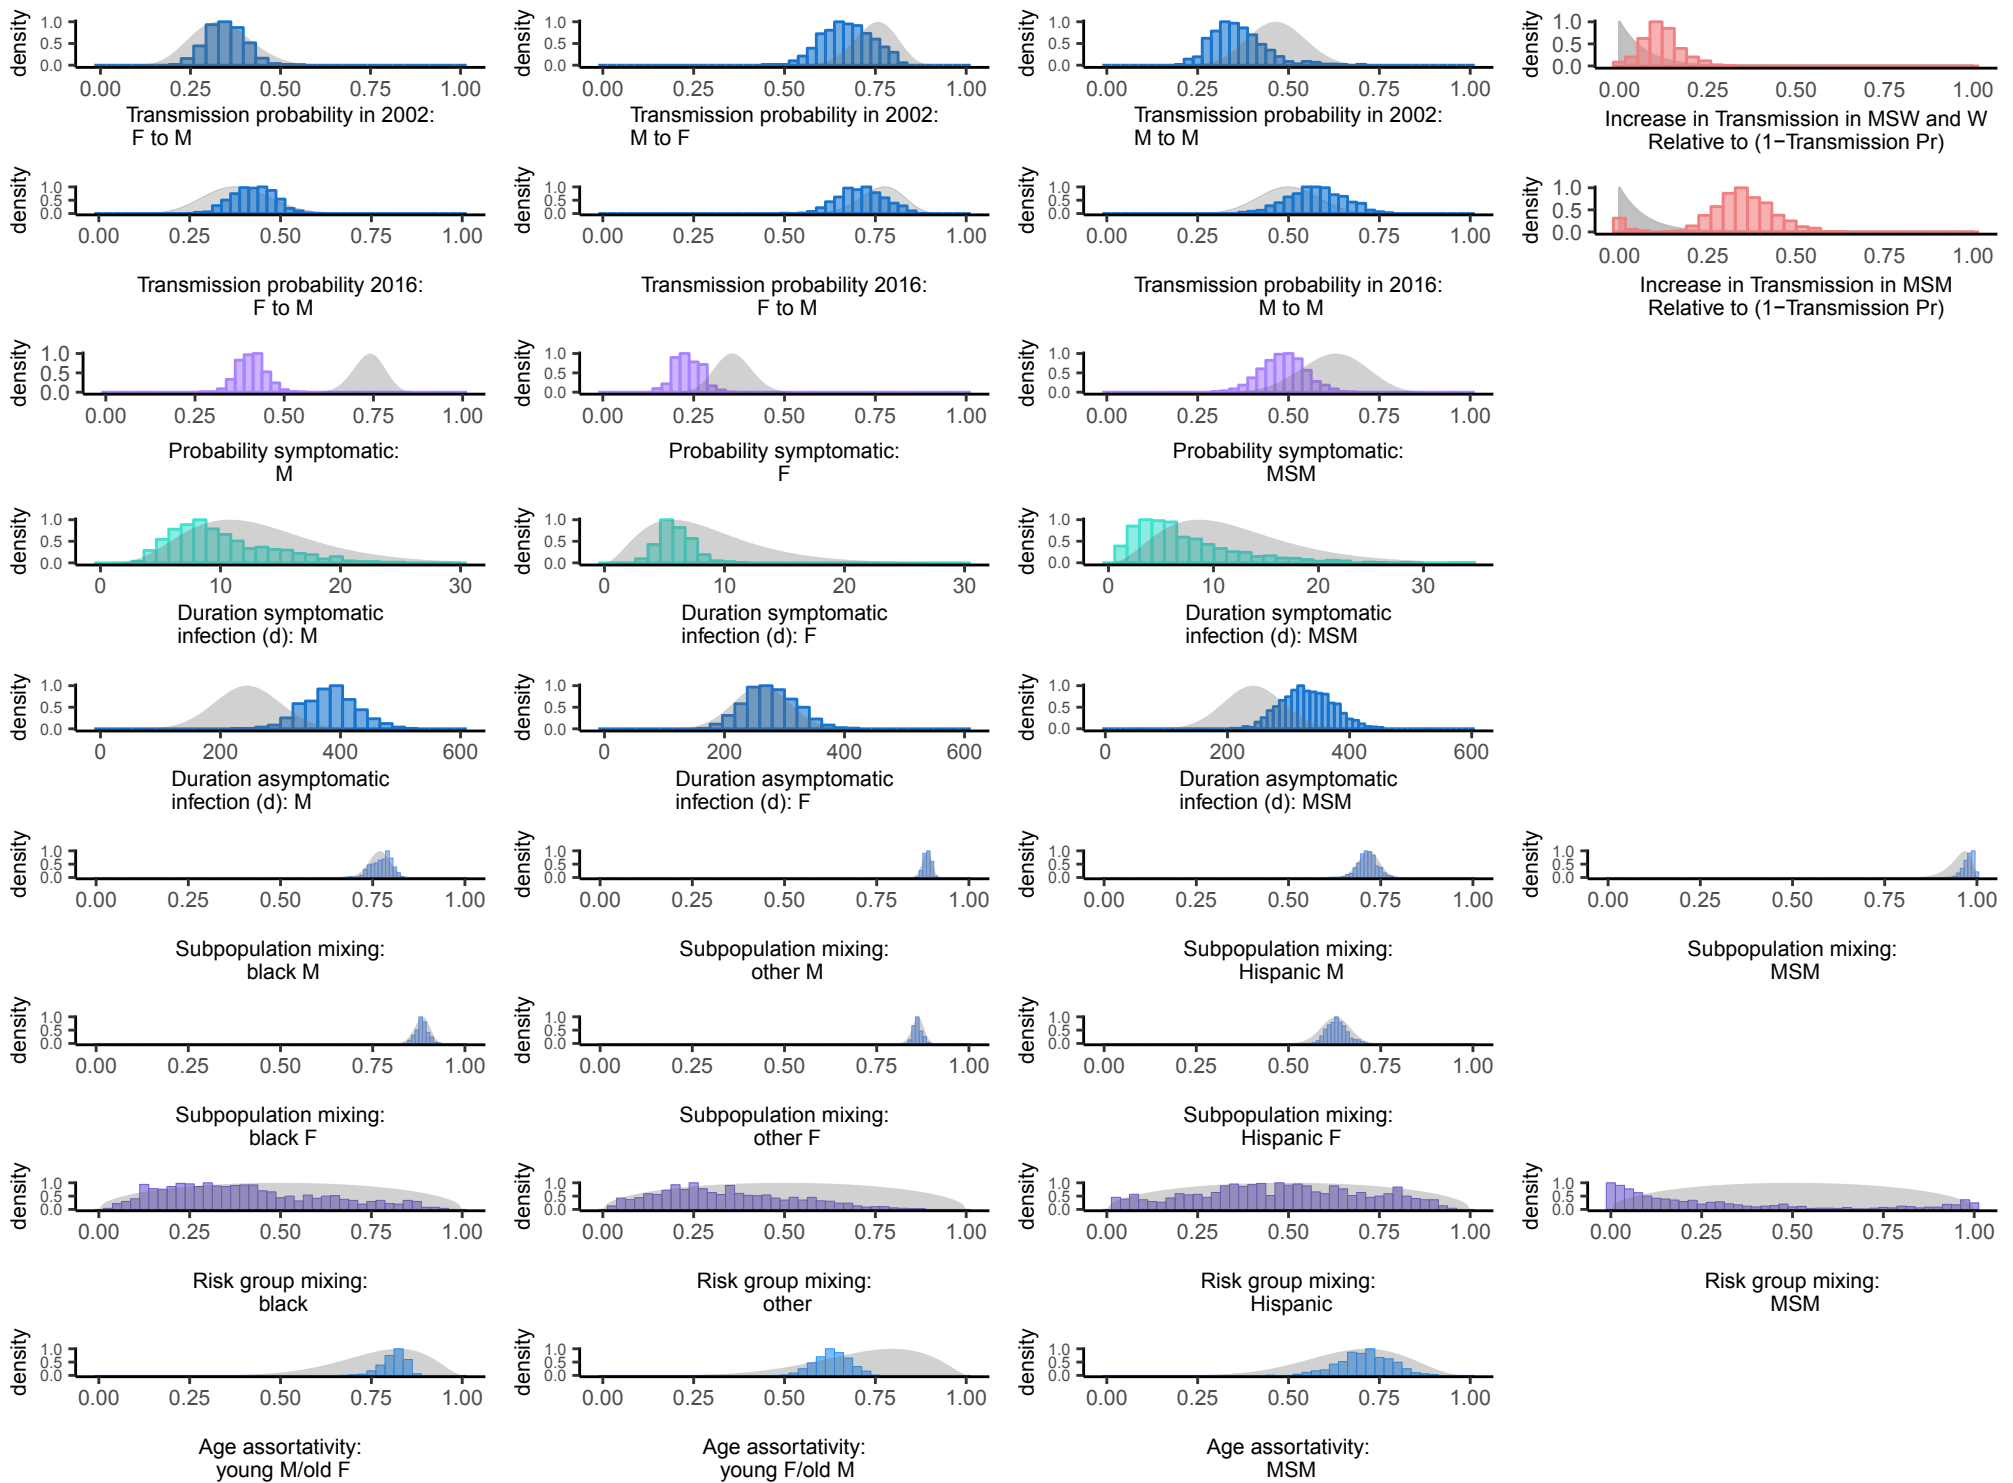

Priors/posteriors (2/3)

Prior distributions are represented in grey, posterior samples represented in color

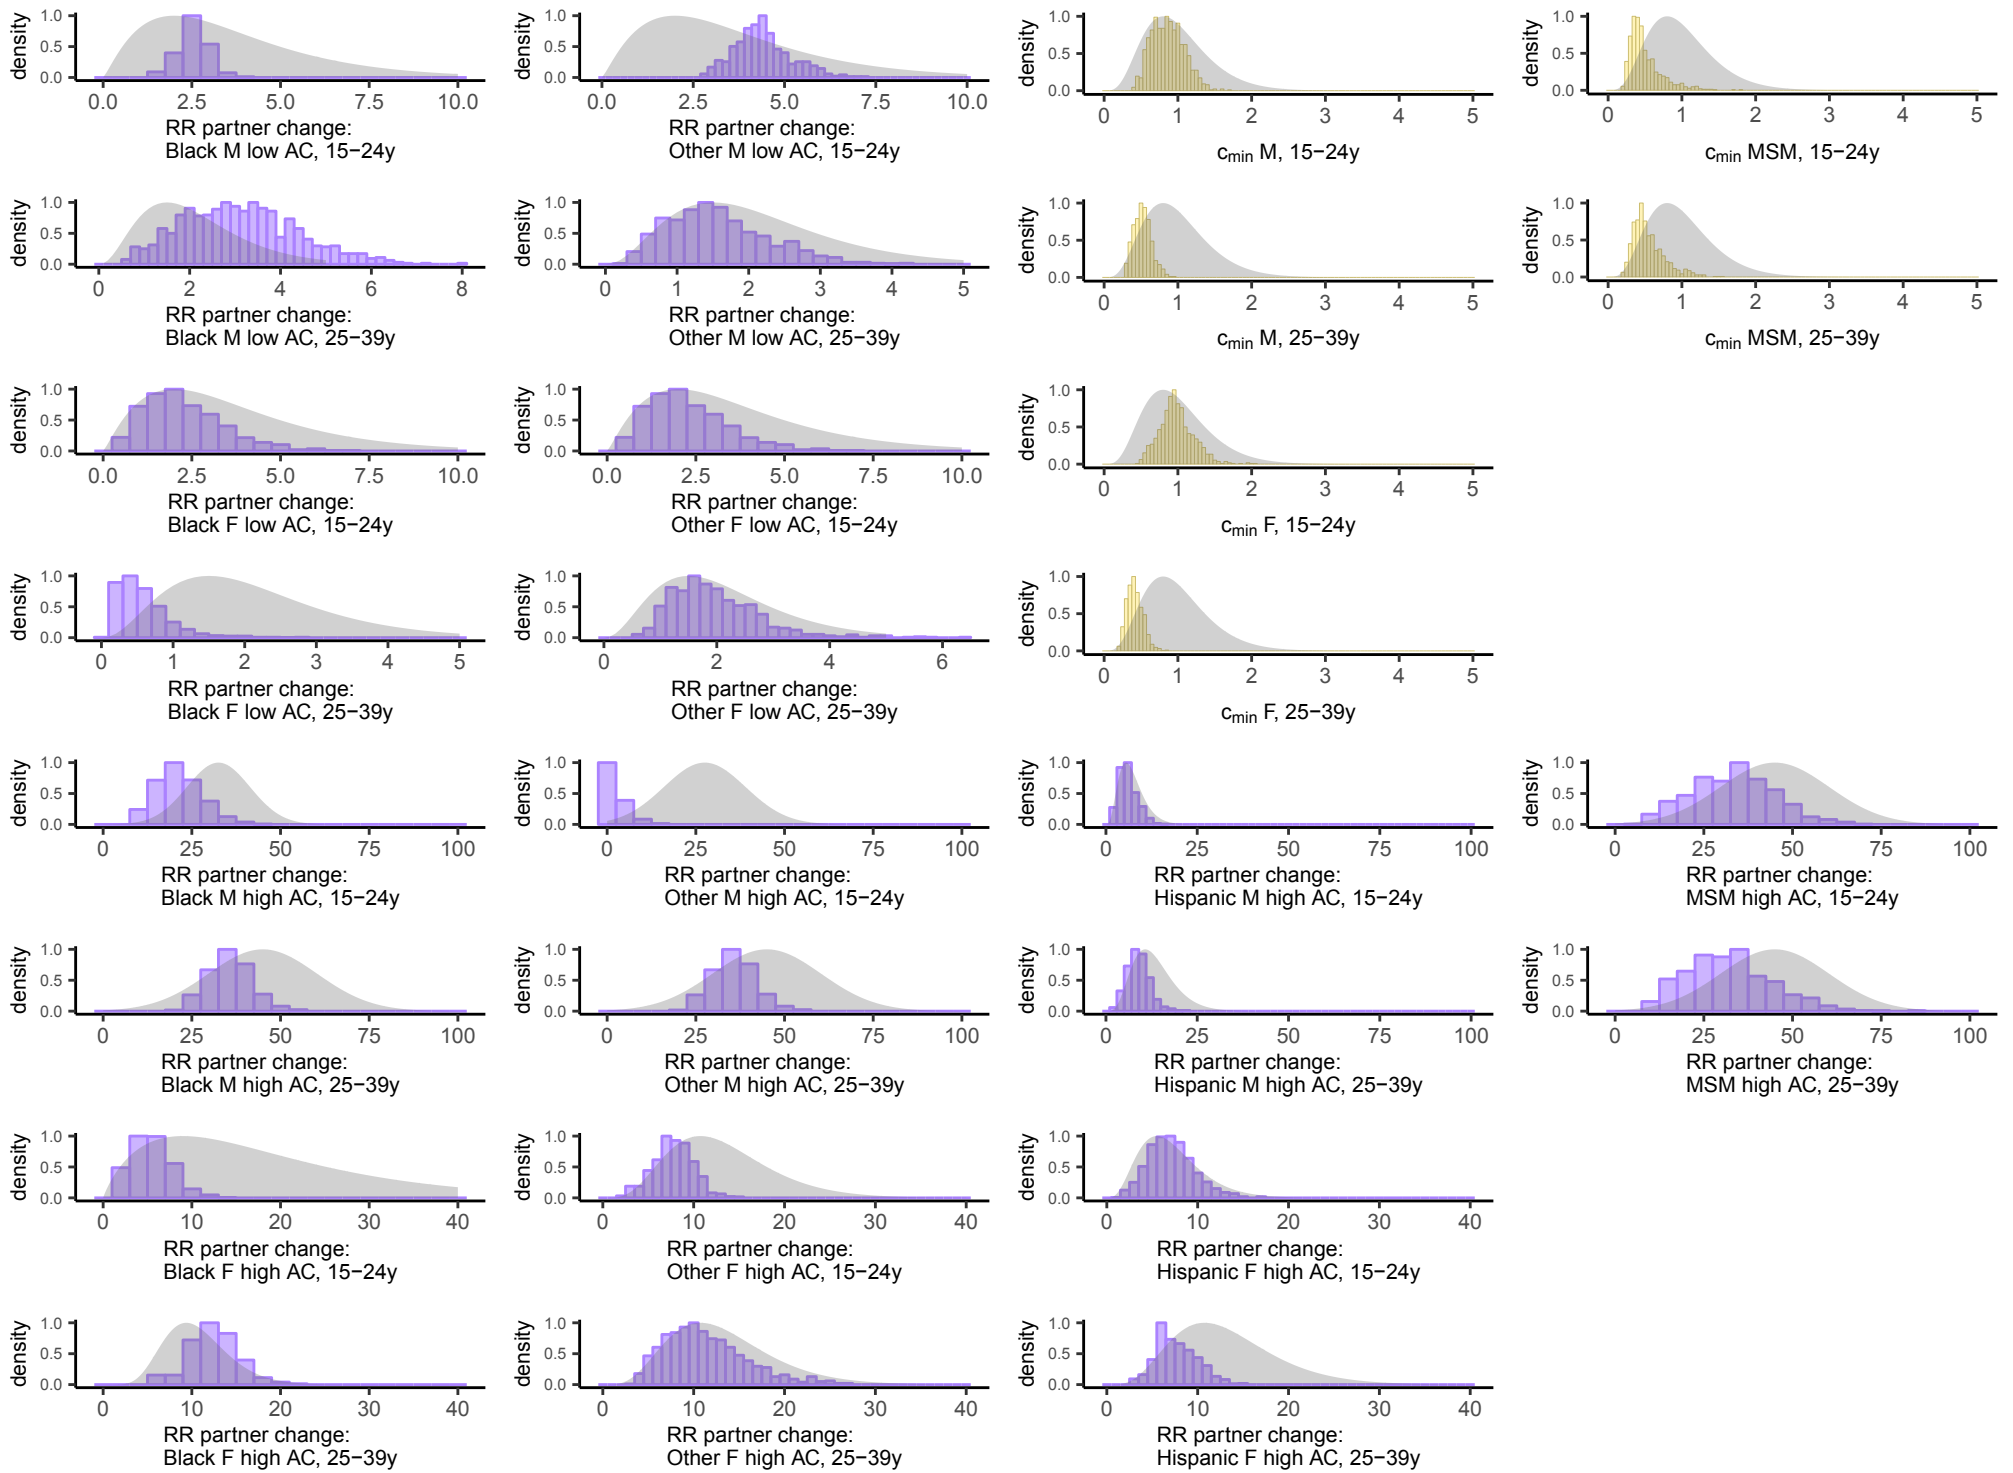

Priors/posteriors (3/3)

Prior distributions are represented in grey, posterior samples represented in color
